1 **A transient apical extracellular matrix relays cytoskeletal patterns to shape permanent**  
2 **acellular ridges on the surface of adult *C. elegans***

3  
4  
5  
6 Sophie S. Katz<sup>1</sup>, Trevor J. Barker<sup>2^</sup>, Hannah M. Maul-Newby<sup>1^</sup>, Alessandro P. Sparacio<sup>2</sup>, Ken  
7 C.Q. Nguyen<sup>3</sup>, Chloe L. Maybrun<sup>1</sup>, Alexandra Belfi<sup>2</sup>, Jennifer D. Cohen<sup>2</sup>, David H. Hall<sup>3</sup>, Meera  
8 V. Sundaram<sup>2\*</sup>, Alison R. Frand<sup>1\*</sup>

9 <sup>1</sup>Department of Biological Chemistry, David Geffen School of Medicine, University of California,  
10 Los Angeles

11 <sup>2</sup>Department of Genetics, University of Pennsylvania Perelman School of Medicine

12 <sup>3</sup>Department of Neuroscience, Albert Einstein College of Medicine

13  
14  
15 <sup>^</sup>Equal contributions

16  
17 \*Co-corresponding authors:

18 [sundaram@pennmedicine.upenn.edu](mailto:sundaram@pennmedicine.upenn.edu)

19 [afrand@mednet.ucla.edu](mailto:afrand@mednet.ucla.edu)

20  
21  
22  
23  
24  
25  
26  
27  
28 **Keywords:** apical constriction, epidermal morphogenesis, cuticle, alae, molting, Zona-Pellucida  
29 domain proteins

30 **SUMMARY**

31

32 Apical extracellular matrices can form protruding structures such as denticles, ridges,  
33 scales, or teeth on the surfaces of epithelia. The mechanisms that shape these structures  
34 remain poorly understood. Here, we show how the actin cytoskeleton and a provisional matrix  
35 work together to sculpt acellular longitudinal alae ridges in the cuticle of adult *C. elegans*.  
36 Transient actomyosin-dependent constriction of the underlying lateral epidermis accompanies  
37 deposition of the provisional matrix at the earliest stages of alae formation. Actin is required to  
38 pattern the provisional matrix into longitudinal bands that are initially offset from the pattern of  
39 longitudinal actin filaments. These bands appear ultrastructurally as alternating regions of  
40 adhesion and separation within laminated provisional matrix layers. The provisional matrix is  
41 required to establish these demarcated zones of adhesion and separation, which ultimately give  
42 rise to alae ridges and their intervening valleys, respectively. Provisional matrix proteins shape  
43 the alae ridges and valleys but are not present within the final structure. We propose a  
44 morphogenetic mechanism wherein cortical actin patterns are relayed mechanically to the  
45 laminated provisional matrix to set up distinct zones of matrix layer separation and accretion  
46 that shape a permanent and acellular matrix structure.

## 47 INTRODUCTION

48  
49 Apical extracellular matrices (aECMs) line all epithelial surfaces in contact with the  
50 environment. These aECMs vary in composition, but typically contain a mix of proteins,  
51 carbohydrates and lipids that are organized into recognizable layers. Some aECMs are soft and  
52 gel-like, but others form more rigid structures with characteristic shapes, such as the hook-like  
53 denticles or cuticle ridges of insects and nematodes (Cox, 1981; Fernandes et al., 2010) or the  
54 scales on butterfly wings (Lloyd and Nadeau, 2021). Examples of aECM in humans include  
55 mucin- and proteoglycan-rich linings within many tube lumens (Gaudette et al., 2020;  
56 Johansson et al., 2013; Whitsett et al., 2015); the tectorial membrane, a flexible aECM sheet  
57 that relays sound waves within the inner ear (Sellon et al., 2019); hair, an amalgamation of  
58 keratinized cells and extracellular macromolecules (Harland and Plowman, 2018); and tooth  
59 enamel, a composite of calcium phosphate minerals and matrix proteins (Moradian-Oldak and  
60 George, 2021). Mutations that affect component matrix proteins cause various disease  
61 phenotypes (Gaudette et al., 2020; Schaeffer et al., 2021; Sellon et al., 2019; Whitsett et al.,  
62 2015). Despite the widespread functional and medical significance of the aECM, the cellular and  
63 molecular mechanisms that sculpt apical matrices are not well understood.

64  
65 In some cases, the shape of an aECM structure is molded at least in part by the shape  
66 of the underlying epithelium at the time of matrix deposition. For example, denticles and  
67 taenidial ridges on insect cuticles originate as actin-based cellular protrusions that subsequently  
68 become coated with aECM (Fernandes et al., 2010; Hannezo et al., 2015; Ozturk-Colak et al.,  
69 2015). The cellular protrusions eventually withdraw, leaving the rigid aECM structures in place.  
70 Differences in matrix composition affect not only denticle or taenidia shape but also the apical  
71 domain architecture within the underlying cells, suggesting mechanical connections among the  
72 aECM, apical junctions, and the actin cytoskeleton. However, these mechanical links between  
73 aECM and the cytoskeleton have yet to be fully elucidated. Furthermore, some complex aECM  
74 structures such as nematode alae are not obviously associated with cellular protrusions (Cox,  
75 1981; Sapio et al., 2005), raising the question of how such acellular structures are shaped.

76  
77 The *C. elegans* body cuticle is a multi-layered aECM composed mainly of collagens  
78 (Page and Johnstone, 2007). *C. elegans* sheds and replaces its cuticle by molting to progress  
79 between each of its four larval stages and to enter adulthood (Knight et al., 2002; Singh and  
80 Sulston, 1978; Sulston and Horvitz, 1977). The cuticle of each stage is unique in structure:

81 Longitudinal acellular ridges or "alae" form above the lateral (seam) epidermis in L1s, dauer  
82 larvae, and adults, but not in the intervening L2, L3, or L4 stages (Fig. 1) (Cox, 1981).  
83 Therefore, alae patterns must be generated *de novo*, rather than propagated from one life stage  
84 to the next across the molts. The number, size, and shape of alae ridges also varies among  
85 L1s, dauer larvae, and adults (Cox, 1981). The basis of these stage-specific morphologies is  
86 unclear, except for the differential requirements for specific aECM proteins, including Zona  
87 Pellucida (ZP)-domain cuticulin proteins and various provisional matrix components (Cohen et  
88 al., 2019; Flatt et al., 2019; Forman-Rubinsky et al., 2017; Muriel et al., 2003; Sapio et al., 2005;  
89 Sebastiano et al., 1991).

90  
91 Actomyosin-dependent forces and cuticle matrix buckling have been indirectly implicated  
92 in alae formation at the L1 and dauer stages, but the specific steps involved have not been  
93 characterized in detail. L1 cuticle formation occurs in the context of actomyosin-driven seam cell  
94 apical constriction, which elongates the embryo and narrows the entire body shape (Priess and  
95 Hirsh, 1986; Zhang et al., 2011). Similarly, dauer larvae are radially-constricted compared to the  
96 preceding larval stage (Flatt et al., 2019; Sebastiano et al., 1991; Singh and Sulston, 1978).  
97 Cuticulin mutants that lack alae at one or both of these stages also have wider seam cells and a  
98 dumpy body shape (Sapio et al., 2005). Based on these observations, Sapio et al. (2005)  
99 proposed that stage-specific ZP proteins somehow generate or distribute constrictive forces that  
100 fold the developing cuticle into alae ridges over the narrowing seam cells. However, this "cuticle  
101 bending" model was not further tested experimentally and also did not explain how alae form in  
102 the adult, where overall volume increases while the general body shape remains similar to that  
103 of the preceding L4 stage (Fig. 1A).

104  
105 Recent work has shown that a ZP-rich provisional matrix precedes formation of each *C.*  
106 *elegans* cuticle (Cohen and Sundaram, 2020). In the embryo, the first cuticle is synthesized  
107 beneath a provisional matrix termed the embryonic sheath (Costa et al., 1997; Priess and Hirsh,  
108 1986; Vuong-Brender et al., 2017). During the molt cycle, epidermal cells secrete a new  
109 provisional apical matrix beneath each pre-molt cuticle before synthesis of the post-molt cuticle  
110 (Fig. 1A) (Forman-Rubinsky et al., 2017; Gill et al., 2016). Components of the provisional matrix  
111 are removed before or along with the pre-molt cuticle. This transient provisional matrix may help  
112 maintain tissue and body shape during the molting process. The provisional matrix also  
113 influences the organization of the subsequent cuticle and shapes the alae of the L1, dauer and

114 adult stages, potentially by acting as a scaffold for further matrix deposition (Forman-Rubinsky  
115 et al., 2017; Gill et al., 2016).

116

117         Here, we examined how the actin cytoskeleton and the provisional matrix work together  
118 to sculpt the alae of adult *C. elegans*. Transient actomyosin-dependent narrowing of the seam  
119 surface accompanies deposition of the provisional matrix at early stages of alae formation, but it  
120 does not appear to buckle the apical membrane. Instead, longitudinal actin filament bundles  
121 (AFBs) at the seam cortex align with ultrastructural delaminations and future valleys that flank  
122 alae ridges. Actin is required to pattern the provisional matrix into longitudinal bands, and the  
123 provisional matrix is required to establish demarcated zones of matrix layer adhesion and  
124 separation which ultimately give rise to alae ridges and their intervening valleys, respectively.  
125 We propose a morphogenetic mechanism wherein cortical actin patterns are relayed  
126 mechanically to the laminated provisional matrix to set up distinct zones of matrix layer  
127 separation and accretion, thereby shaping a permanent and acellular matrix structure.

128 **RESULTS**

129

130 **Morphogenesis of the adult-stage alae begins midway through the L4 stage**

131

132 The *C. elegans* epidermis consists of cells and multinucleate syncytia that together  
133 synthesize most of the external cuticle (Podbilewicz and White, 1994; Sulston and Horvitz, 1977).  
134 The lateral seam and adjacent hyp7 syncytium are the two largest tissues and are connected by  
135 apical-lateral junctions analogous to those found in vertebrates and insects (Pasti and Labouesse,  
136 2014) (Fig. 1A). The seam cells undergo stem cell-like asymmetric divisions early in each larval  
137 stage: anterior daughters fuse with hyp7, while posterior daughters remain in place and  
138 reconnect. During L4, seam cells exit the cell-cycle, fuse into bilateral syncytia, and ultimately  
139 synthesize alae - three key events that mark the L4-to-adult transition (Sulston and Horvitz, 1977).

140

141 Adult alae consist of three longitudinal ridges that decorate the cuticle overlying the seam  
142 (Cox, 1981) (Fig. 1). Alae ridges stain prominently with the lipophilic fluorescent dye Dil (Schultz  
143 and Gumienny, 2012) (Fig. 1B). Alae also can be seen with Differential Interference Contrast  
144 (DIC) microscopy as alternating dark and light stripes, which we confirmed correspond to the  
145 three ridges and four flanking valleys, respectively (Fig. 1B). As viewed by transmission electron  
146 microscopy (TEM), alae are acellular structures and protrude approximately 0.5 microns above  
147 the rest of the cuticle surface (Fig. 1C).

148

149 We were able to visualize the timing of adult alae formation using DIC microscopy of L4  
150 animals staged based on developing vulva tube morphology (Fig. 1D). Longitudinal stripes on the  
151 lateral surface first became visible at stages L4.5-L4.6. The stripes were initially subtle but  
152 gradually became more prominent at later stages. Thus, morphogenesis of the alae began well  
153 before the L4-to-adult molt and appeared to be a gradual rather than abrupt process.

154

155 **Actomyosin filaments in both the seam and hyp7 shape the adult-stage alae**

156

157 To test the role of the actin cytoskeleton in forming alae, we used bacterial-mediated  
158 RNA-interference (RNAi) to silence actin genes in developing larvae and later examined the  
159 lateral surfaces of young adults by DIC microscopy and staining with Dil.

160

161 Five *C. elegans* genes encode actin monomers. During the L4 stage, epidermal cells  
162 and syncytia express *act-2* most highly, with some evidence for expression of *act-1*, -3 and -4 at  
163 other stages (Katsanos et al., 2021; Willis et al., 2006). To simultaneously knock down *act-1*, -2,  
164 -3 and -4, we selected an *act-2*-derived dsRNA trigger complementary to all four transcripts  
165 (Methods). Further, we customized and applied an established experimental paradigm to  
166 selectively knock down actin in either the seam or hyp7. This system involved tissue-specific  
167 expression of RDE-1, the worm homolog of Argonaute, in *rde-1(ne219)* mutants otherwise  
168 insensitive to siRNAs (Qadota et al., 2007). This approach bypassed the embryonic and larval  
169 lethality associated with systemic *actin(RNAi)* over the full course of development. Waiting until  
170 the L2 stage to deliver *actin* dsRNAs also bypassed much of this lethality; attenuated  
171 *actin(RNAi)* larvae developed into small adults.

172  
173 Attenuated *actin(RNAi)* or preferential knockdown of actin in either the seam or hyp7  
174 resulted in patches of fragmented and disorganized adult-stage alae (Fig. 2A,C,D). The most  
175 severely affected animals lacked continuous ridges entirely, while others retained the outer  
176 dorsal and ventral ridges but showed breaks and misorientations within the central alae ridge,  
177 resulting in a “braid-like” appearance. Larger gaps in the alae (> 5 microns long) sometimes  
178 flanked the disorganized regions, and in these cases the underlying epidermis was likely  
179 disrupted due to earlier defects in seam cell division and reconnection, as previously described  
180 (Ding and Woollard, 2017). Because cell division and fusion were not of interest in this study,  
181 our approaches were designed to minimize such defects and our analysis prioritized extended  
182 regions of alae disorganization over any large gaps in the alae (Fig. 2D, Methods). The  
183 abovementioned alae deformities were not observed in *rde-1* null mutants fed *actin* dsRNAs or  
184 in *wild-type* animals fed short dsRNAs transcribed from the vector. The fact that knockdowns in  
185 either the seam or hyp7 caused similar deformities suggests that actin networks within both  
186 syncytia work cooperatively to shape the adult-stage alae.

187  
188 Non-muscle myosin (NM II) often partners with actin to generate morphogenetic forces  
189 (Martin and Goldstein, 2014; Munjal and Lecuit, 2014). The *nmy-1* and *nmy-2* genes of *C.*  
190 *elegans* both encode heavy chains of NM II that are 47% identical in primary sequence to  
191 human NMHC-IIB and expressed in the epidermis (Piekny et al., 2003). We used *nmy-1(RNAi)*  
192 and conditional alleles of *nmy-2* to partially inactivate NM II. Fragmented and disorganized alae  
193 were observed on most *nmy-1(RNAi); nmy-2(ts)* double mutants cultivated at restrictive  
194 temperature (Fig. 2B-D). In contrast, only minor deformities in the alae were observed in *nmy-*

195 *1(RNAi)* or *nmy-2(ts)* single mutants, although *nmy-2(ts)* defects were greatly enhanced by  
196 expression of an F-actin biosensor and junction marker (see below) (Fig. 2D). The combinatorial  
197 effect of *nmy-1(RNAi)* and *nmy-2(ts)* suggests that these paralogs make redundant  
198 contributions to a morphogenetic mechanism involving actomyosin-dependent forces.

199

## 200 **Apical Junction (AJ) components that interact with actin networks shape the adult alae**

201

202 Actomyosin filaments often attach to cell membranes at cell-cell junctions (Martin and  
203 Goldstein, 2014; Munjal and Lecuit, 2014). To evaluate the role of AJs in patterning the adult  
204 alae, we similarly used RNAi and a hypomorphic allele to knock down key AJ components while  
205 larvae developed and then examined the lateral surface of young adults. HMP-1/ $\alpha$ -catenin is the  
206 actin-binding component of cadherin-catenin complexes (CCCs) that mechanically link the  
207 various epidermal cells of *C. elegans* (Costa et al., 1998; Kang et al., 2017; Pasti and  
208 Labouesse, 2014). The Zonula Occludens (ZO) homolog ZOO-1 cooperatively recruits actin  
209 bundles to AJs (Lockwood et al., 2008). Defective alae were observed on the surface of more  
210 than one third of surviving *hmp-1(fe4)* hypomorphic mutants, and these defects were further  
211 enhanced by simultaneous knockdown of *zoo-1* (Fig. 2E-F). Thus, genetic manipulations known  
212 to impede the transmission of mechanical forces through AJs interfered with morphogenesis of  
213 adult-stage alae.

214

215

## 216 **Transient narrowing of the seam apical cortex precedes alae formation**

217

218 To investigate the mechanism by which actomyosin networks pattern adult-stage alae, we  
219 further characterized the superficial shape of the seam epidermis and organization of cortical actin  
220 across the L4 stage. For this purpose, we used AJM-1 fusion proteins to label AJs among the  
221 seam and hyp7 syncytia (Fig. 3A,B) (Koppen et al., 2001; Lehrbach et al., 2009). We also  
222 constructed and used a highly sensitive sensor for F-actin composing the Calponin homology  
223 domain (CH) of human Utrophin (UTRN) tagged with GFP and driven by the seam-specific  
224 promoter of *egl-18* (Koh and Rothman, 2001) (Fig. 3A,B). This CH domain binds F-actin  
225 selectively and reversibly, and UTRNCH::GFP does not appreciably perturb actin dynamics when  
226 expressed at practical levels (Burkel et al., 2007; Moores and Kendrick-Jones, 2000). To achieve  
227 fine temporal resolution, we isolated precisely staged transgenic nematodes and imaged them at



228 regular ~1hr intervals (Methods). We also collected images of the vulva to assess animal stage  
229 directly (Fig. 1D).

230

231 The AJ marker revealed that seam cell fusion occurred immediately following the last  
232 round of cell divisions early in the L4 stage, with fusion complete before or during L4.2 (Fig. 3B).  
233 Soon after seam fusion, the apical surface of seam syncytia narrowed, appearing most narrow  
234 and uniform at L4.3 to L4.4 (Fig. 3B,C). The apical surface of the seam then widened slowly, as  
235 the AJs spread apart over the following several hours and animals completed the L4/adult molt  
236 (Fig. 3B,C). The observed cell shape changes suggested transient apical constriction on the  
237 transverse or dorsal-ventral (D-V) axis prior to initial alae formation, followed by gradual  
238 relaxation as the alae form and enlarge.

239

240

#### 241 **Longitudinal AFBs in the seam presage the pattern of adult alae**

242

243 The seam-specific UTRNCH::GFP marker revealed that striking changes in actin  
244 appearance accompanied seam narrowing and relaxation (Fig. 3B,D). At the onset of narrowing  
245 (~L4.3), four longitudinal AFBs assembled at the cortex of the seam syncytia; two of these AFBs  
246 co-localized with AJM-1::mCHERRY along the dorsal and ventral junctions with hyp7, while the  
247 other two AFBs were located more medially. At the narrowest seam stage (L4.3-L4.4), often  
248 only three longitudinal AFBs were detected, suggesting the medial AFBs had moved closer  
249 together and potentially joined. As the seam widened again (L4.5-L4.7), four longitudinal AFBs  
250 were again observed.

251

252 Medial AFBs began to disassemble and breaks in the outer junctional AFBs appeared at the  
253 L4.7-L4.8 stages (Fig. 3B), after the time that alae first become visible by DIC (Fig. 1D). Spikes  
254 of F-actin that apparently crossed the dorsal and ventral junctions also became more prominent  
255 at this time. This progressive transition from continuous longitudinal to discontinuous transverse  
256 F-actin structures along the margins might reflect a concurrent transition in the net direction of  
257 force propagation between the seam and hyp7.

258

259 In summary, the transient narrowing of seam syncytia midway through L4 coincided with  
260 dynamic reorganization of the bulk of cortical F-actin into three or four longitudinal AFBs. This  
261 pattern is not what we would expect for a typical apical constriction process, where AFBs are

262 usually either isotropic or aligned in the direction of tissue narrowing (Koenderink and Paluch,  
263 2018). However, these distinctive arrangements are reminiscent of the adult alae pattern of three  
264 longitudinal ridges and four flanking valleys, which first manifest while these AFB patterns are still  
265 present.

266

267

## 268 **Actin assembles into both longitudinal and circumferential AFBs in hyp7**

269

270 As our RNAi experiments indicated that actomyosin networks in hyp7 syncytia also  
271 contribute to morphogenesis of the alae (Fig. 2), we went on to track the distribution of cortical  
272 actin in hyp7 across the L4 stage (Fig. 4). For this purpose, we constructed a similar but distinct  
273 F-actin sensor comprising UTRNCH tagged with dsRED and driven by the hypodermal-specific  
274 promoter of *dpy-7* (Gilleard et al., 1997). This sensor revealed both longitudinal AFBs along the  
275 hyp7-seam margins and circumferential filament bundles (CFBs), some of which branched off  
276 from the longitudinal bundles (Fig. 4A).

277

278 Like seam AFBs, the hyp7 longitudinal AFBs formed immediately following seam cell  
279 fusion (Fig 4A,B). These AFBs remained prominent throughout seam narrowing and relaxation  
280 (as defined in Fig. 3) and then disappeared at the L4-adult molt. We infer that longitudinal seam  
281 and hyp7 AFBs run in parallel along each side of the seam-hyp7 AJs.

282

283 The hyp7 CFBs have long been considered a hallmark of molting animals (Costa et al.,  
284 1997), but our analysis showed that they assemble earlier than previously thought, and that  
285 their appearance changes at the time of seam narrowing (Fig. 4A). Prior to seam narrowing,  
286 some whisker-like filaments branched off from the longitudinal bundles at variable angles.  
287 Following seam narrowing, CFBs became increasingly anisotropic (aligned in parallel) up until  
288 the end of the L4-adult molt, when they collapsed at ecdysis (Fig. 4C).

289

290

## 291 **Seam narrowing and AFB organization depend on NM II**

292

293 If AFBs and/or CFBs are contractile structures, we would expect them to associate with NM II  
294 (Martin and Goldstein, 2014; Munjal and Lecuit, 2014). To test this, we examined the localization  
295 patterns of NMY-1::GFP and NMY-2::GFP expressed from the endogenous loci (Dickinson et al.,

296 2013; Vuong-Brender et al., 2017), and we generated a seam UTRNCH::dsRed reporter and  
297 compared the patterns of actin and NMY-2::GFP (Fig. 5A,B). Surprisingly, while UTRNCH::dsRed  
298 marked three longitudinal AFBs upon seam narrowing, it differed from UTRNCH::GFP in that,  
299 during relaxation, it clearly marked only the two junctional AFBs and only faintly if at all marked  
300 the two medial AFBs (Fig. 5A). One difference between GFP and dsRed is that the latter is an  
301 obligate tetramer (Baird et al., 2000), so differences in conformation might explain the discrepancy  
302 in the patterns seen with these two actin sensors. Whatever the explanation, the differential ability  
303 of UTRNCH::dsRed to mark junctional vs. medial AFBs suggests that these AFBs may differ in  
304 organization.

305  
306 NMY-1::GFP and NMY-2::GFP puncta aligned along or near the two junctional AFBs at the  
307 presumptive seam margins, both during and following seam narrowing (Fig. 5A,B). NMY-2 puncta  
308 also marked the transient medial AFB at the narrowest seam stage but did not appear to mark  
309 medial AFBs at later stages (Fig. 5A). Neither NMY-1 nor NMY-2 detectably marked hyp7 CFBs  
310 at the stages examined (n = at least 12 each). These data suggest that, at the time of seam  
311 narrowing, the longitudinal AFBs are part of a contractile actomyosin network. However, during  
312 seam relaxation, the medial AFBs (visible with UTRNCH::GFP) may no longer be contractile.

313  
314 To test if NM II-dependent actomyosin constriction drives the observed changes in seam  
315 syncytium shape, we examined this tissue in NM II knockdowns at L4.4 (Fig. 5). Both  
316 *nmy-1(RNAi)* and *nmy-2(ts)* single mutants displayed misshapen syncytia with ectopic branches  
317 and protrusions (Fig. 5B). *nmy-1(RNAi)* larvae had seam widths only slightly larger than those of  
318 age-matched controls, while *nmy-2(ts)* single mutants (which show genetic interactions with the  
319 actin sensor - Fig. 2D) or *nmy-2(ts); nmy-1(RNAi)* double mutants had significantly distended  
320 seam syncytia, on average more than twice as wide as controls (Fig. 5B,C). Therefore, seam  
321 narrowing does depend on NM II.

322  
323 To further characterize the relationship between NM II and the various actin structures  
324 observed, we examined the distribution of UTRNCH::GFP in NM II knockdowns. Junctional  
325 AFBs were still detected in *nmy-1(RNAi) nmy-2(ts)* double mutants but medial AFBs were  
326 largely fragmented or absent (Fig. 5C). These findings suggest that NM II is required for proper  
327 assembly of medial AFBs, implicating these structures in seam narrowing and alae shaping.

328  
329

330 **Provisional matrix components are required for adult alae shaping but not seam**  
331 **narrowing**

332

333 The misshapen or fragmented adult alae seen after actin, NM II, or junctional cadherin  
334 depletion are similar to those previously reported in some mutants affecting the provisional  
335 matrix that precedes each cuticle (Forman-Rubinsky et al., 2017; Gill et al., 2016). To test if  
336 other known components of this matrix are also required to pattern the adult alae, we used  
337 RNAi knockdown, mutant escapers, or mosaic approaches to circumvent the early arrest  
338 phenotypes seen in null mutants. RNAi knockdown or loss of the ZP proteins NOAH-1 or FBN-1  
339 resulted in alae deformations similar to those previously reported after loss of the ZP protein  
340 LET-653 (Forman-Rubinsky et al., 2017) (Fig. 6A,B). Mosaic animals losing the lipocalin LPR-3  
341 in subsets of seam cells (see Methods) also had regions of misshapen or fragmented alae and,  
342 in some cases, regions where alae were entirely missing (Fig. 6A,B). Therefore, the provisional  
343 matrix appears broadly important for forming and shaping adult alae.

344

345 Sapio et al (2005) proposed that, in L1 and dauer larvae, ZP matrix polymerization might  
346 help generate the force that drives seam narrowing. To test if ZP proteins in the provisional  
347 matrix are required for seam narrowing during the L4 stage, we examined *let-653* mutant L4s  
348 obtained by rescuing the lethal embryonic excretory tube defects with a tissue-specific rescue  
349 transgene (Methods). These mutants have defective alae (Fig. 6A,B) but are otherwise healthy.  
350 Seam morphology in these animals was examined with AJM-1::GFP. At L4.4, *let-653* mutants  
351 had fully fused and narrow seam cells that resembled those in wild-type (Fig. 6C,D), so at least  
352 this matrix component is not required for seam narrowing.

353

354

355 **Provisional matrices are patterned into longitudinal bands during and following seam**  
356 **narrowing**

357

358 To examine the timing and patterns of provisional matrix deposition, we visualized the  
359 lipocalin LPR-3 and the ZP-domain proteins LET-653, FBN-1, and NOAH-1 using functional  
360 translational fusions expressed from the endogenous loci or from extrachromosomal transgenes  
361 (Cohen et al., 2020; Vuong-Brender et al., 2017) (Methods) (Fig. 7A). Provisional matrix  
362 proteins were visible over the seam syncytium during the L4.3-L4.4 stages, suggesting they are  
363 secreted prior to and/or during the period of seam narrowing (Fig. 7B Fig. 8A,C,E). The

364 provisional matrix initially appeared diffuse rather than patterned, but over the next few hours,  
365 each protein resolved into a characteristic pattern of longitudinal bands that correspond to  
366 developing alae ridges or their associated valleys and borders (Fig. 7B-D). LPR-3 and LET-653  
367 bands appeared quite early, before alae became clearly detectable by DIC. LPR-3 specifically  
368 marked three developing ridges, while LET-653 marked two or four valleys (Fig. 7B). NOAH-1  
369 bands resolved slightly later and marked both ridges and valleys in different z-planes (Fig. 7B-  
370 D). FBN-1 was the last factor to become patterned, very close to the L4-Adult molt, and marked  
371 only valleys (Fig. 7B,D). Each protein also showed a different timeline of disappearance, but all  
372 disappeared from the alae region following the L4-adult molt. Therefore, these provisional matrix  
373 proteins are present during the period when alae are first being patterned and formed, but they  
374 are not permanent components of these ridge structures.

375

376

### 377 **Actin is required to pattern the provisional matrix into longitudinal bands**

378

379 To understand the relationships between the seam longitudinal AFBs and the overlying  
380 longitudinal bands of provisional matrix, we combined our seam actin sensors with different  
381 matrix fusions (Fig. 8A-C). In narrowed seams, when three longitudinal AFBs were present,  
382 SfGFP::LPR-3 was cleared from a thin band directly overlying the medial AFB (Fig. 8A,B). A  
383 similar largely offset relationship was observed between the AFBs and the 3 apical bands of  
384 SfGFP::LPR-3 or NOAH-1::mCherry in later L4 animals (Fig. 8A-D). Together, these data  
385 suggest that AFBs underlie nascent valleys surrounding each developing ridge.

386

387 To test if AFBs might pattern the provisional matrix, we determined the effect of actin  
388 RNAi on LPR-3 matrix patterns. Following actin knockdown, SfGFP::LPR-3 often localized to  
389 labyrinthine deformities, rather than longitudinal bands (Fig. 8E,F). Furthermore, the remaining  
390 SfGFP::LPR-3 bands frequently contained many small breaks and regions that were faint and  
391 ill-defined (Fig. 8E,F). We conclude that cortical actin networks are required to pattern the  
392 provisional matrix into continuous longitudinal bands, and that loss or mis-patterning of the  
393 provisional matrix can explain mis-patterning of the permanent alae ridges.

394

395

396 **Ultrastructure of the epidermis reveals alternating sites of separation and adhesion**  
397 **among apical matrix layers.**

398

399 To characterize changes in the ultrastructure of the lateral epidermis and overlying  
400 apical matrices that happen while the alae take shape, we turned to transmission electron  
401 microscopy (TEM), using high pressure fixation to best preserve the fragile matrix (Hall et al.,  
402 2012; Weimer, 2006). We collected transverse sections through the mid-body of 10 distinct mid-  
403 L4 specimens, inspected the corresponding micrographs, and ordered the specimens by  
404 inference based on matrix appearance and comparisons to our DIC (Fig. 1D) and confocal  
405 (Figs. 3,4,7) image timelines. The micrographs shown in Figure 9 represent distinct steps in  
406 alae morphogenesis.

407

408 In two inferred L4.3-L4.4 stage specimens (Fig. 9A), the subapical region of the seam  
409 cell (at the adherens junctions) appears very narrow and pinched (0.5-1 micron wide), with hyp7  
410 pushing in on both sides, consistent with apical constriction. Dark electron-dense extracellular  
411 material sits beneath the L4 cuticle, lining the apical plasma membrane of both the seam cell  
412 and hyp7; this material likely corresponds to the provisional matrix, which is deposited at this  
413 stage (Figs. 7,8). The seam cell apical membrane and L4 cuticle remain flat in these specimens.  
414 However, in a third specimen that also appears to be ~L4.4, the seam cell apical surfaces are  
415 still flat, yet the L4 cuticle has seemingly buckled into three deep folds (Fig. S1). This latter  
416 animal has a large break in the L4 cuticle at the vulva lumen, which may have released  
417 mechanical constraints on the tissue and matrix. Alternatively, cuticle buckling could be a  
418 normal but transient response to initial seam constriction.

419

420 In three specimens inferred to be just slightly older, about L4.4 to L4.5 stage (Fig. 9B-C'),  
421 the seam apical surface is narrow (0.9-1.1 microns) and the apical membrane and L4 cuticle are  
422 flat, but four discrete regions of separation appear between matrix layers over the seam. These  
423 separations define three intervening regions of remaining matrix adhesion, which we infer  
424 correspond to the future alae ridges. When comparing two images from different body regions in  
425 one of these specimens (Fig. 9C-C'), the separations are larger, and points of adhesion  
426 narrower, as ridges become more apparent. Dark electron-dense material lines the top and  
427 bottom surfaces of the separations, suggesting that both separations and adhesions occur  
428 between layers composed of the freshly deposited provisional matrix.

429

430 Another feature of these three specimens is the presence of many membrane-bound  
431 vesicles or organelles near the seam and hyp7 apical membranes, including in the apparent  
432 extracellular space where new adult cuticle is forming (Fig. 9B-C'). The extracellular vesicles  
433 (EVs) range in size from ~15 nm (the typical size of exosomes (Doyle and Wang, 2019)) to  
434 >600  $\mu\text{m}$  (resembling migrasomes (Ma et al., 2015)). These EVs may contain materials for  
435 building or modifying the alae and cuticle.

436

437 In the four oldest specimens, inferred to range from L4.6 to L4.8, the seam cell is wider  
438 (1.5-3 microns) and contains many lamellar structures resembling lysosomes or lysosome-  
439 related organelles (LROs) (Fig. 9D,E; Fig. 10C). The nascent adult cuticle underneath the L4  
440 cuticle shows progressively larger alae ridges, with deeper and narrower valleys separating the  
441 ridges. Small points of connection remain between these adult alae ridges and the thinning L4  
442 cuticle above. Much additional matrix material has accreted at the base of the L4 cuticle and  
443 protrudes downward in a pattern that is complementary to that of the adult alae. This material is  
444 presumably "valley-localized" provisional matrix (Fig. 7C,D) that will be removed along with the  
445 old L4 cuticle at the molt.

446

447 From these TEM data, we draw several key conclusions. First, many changes in matrix  
448 appearance occur immediately following the apex of seam narrowing. These changes are  
449 accompanied by the presence of vesicle populations, including EVs, that suggest active  
450 secretion by both the seam and hyp7 syncytia. Second, the seam apical membrane appears  
451 smooth throughout all stages of alae formation, with no evidence of upward protrusions or folds.  
452 Third, formation of alae involves differential separation vs. adhesion of matrix layers within the  
453 provisional matrix zone, with four regions of separation and three intervening regions of  
454 adhesion echoing the spacing of longitudinal AFBs within the relaxing seam and the banding  
455 patterns observed for provisional matrix proteins.

456

457

#### 458 **Ultrastructure of the seam aECM in *let-653* mutants reveals requirements for the** 459 **provisional matrix in patterning differential matrix adhesion**

460

461 The above TEM data suggested that differential matrix separation occurs between layers  
462 of the provisional matrix. To better understand the contribution of provisional matrix to alae  
463 patterning, we also examined *let-653* mutant ultrastructure by TEM.



464

465           Figure 10 shows transverse TEM sections through the lateral epidermis of two mid-L4  
466 *let-653* larvae processed identically and at the same time as the wild-type specimens above. In  
467 the first specimen, which appears to be the youngest of the two, developing alae ridges are  
468 discernible above the seam cell, but there are no clear distinctions between regions of matrix  
469 separation and adhesion (Fig. 10A). In the second specimen, the nascent alae cuticle has  
470 separated entirely from the above L4 cuticle (Fig. 10B). These data show that *let-653*, and likely  
471 the entire provisional matrix, is required for proper patterning of matrix separation vs. adhesion  
472 during alae formation. Thus, while some ridges do form in the mutants, they are not properly  
473 shaped or continuous.

474

475           The seam cell in the older *let-653* specimen also shows signs of abnormal protein  
476 trafficking, based on an accumulation of many large vesicles filled with amorphous fibrils  
477 characteristic of matricellular proteins (Fig. 10B). We previously noted and reported an  
478 accumulation of unusually large vesicles in vulF vulva cells of this same specimen (Cohen et al.,  
479 2020). In contrast, similar vesicles were not observed in seam syncytia of ten wild-type  
480 specimens, including four other late L4s (Fig. 10C). We conclude that, in addition to affecting  
481 matrix ultrastructure, the loss of *let-653* function interferes with the export or clearance of other  
482 matrix factors.

483

## 484 **DISCUSSION**

485

486           Actomyosin networks and ZP-protein aECMs both play many roles in shaping epithelial  
487 tissues (Martin and Goldstein, 2014; Munjal and Lecuit, 2014; Plaza et al., 2010), but how the  
488 two systems are coordinated and how the actin cytoskeleton impacts complex aECM shapes  
489 remain poorly understood. Here we showed that actomyosin networks are required to pattern a  
490 provisional ZP-protein-rich matrix that determines the final structure of acellular alae ridges in  
491 the adult cuticle of *C. elegans*. Figure 11 summarizes our proposed model for how cytoskeletal  
492 patterns are translated into aECM patterns. The four key aspects of this model are: 1) Transient  
493 narrowing of the seam syncytium along the dorsal-ventral axis, through an atypical apical  
494 constriction mechanism involving longitudinal AFBs; 2) Transmission of AFB-dependent pulling  
495 forces across the seam apical membrane to a newly deposited, ZP-rich, provisional matrix,  
496 thereby generating local regions of separation between matrix layers; 3) Concurrent AFB-  
497 dependent patterning of the provisional matrix into longitudinal bands that pre-configure the final



498 alae; 4) Recruitment of distinct collagens or other cuticle components to provisional matrix  
499 bands, thereby propagating regional differences in the short-lived provisional matrix to  
500 permanent differences in cuticle matrix structure. Below we discuss each of these aspects in  
501 more detail.

502

### 503 **An atypical apical constriction mechanism drives transient narrowing of the seam** 504 **syncytium**

505 Seam narrowing depends on NM II and occurs when actin and NM II localize to  
506 longitudinal AFBs flanking the AJs between the seam and hyp7. When attached to AJs,  
507 actomyosin filaments can generate pulling forces to constrict the apical surface of an epithelial  
508 cell (Martin and Goldstein, 2014; Munjal and Lecuit, 2014). Gastrulation, neurulation, and other  
509 essential morphogenetic processes depend on the apical constriction of particular cells within  
510 epithelial sheets (Goldstein and Nance, 2020; Martin and Goldstein, 2014; Martin et al., 2010).  
511 However, in these examples, AFBs typically are oriented isotropically or along the axis of tissue  
512 shortening (Koenderink and Paluch, 2018) rather than in parallel to it as we found in the seam.  
513 Instead, the organization of AFBs in the seam resembles that of AFBs within microridges, which  
514 are maze-like cellular protrusions on the epidermal surface of mucosal epithelia (Pinto et al.,  
515 2019; van Loon et al., 2020). In that case, NM II-containing minifilaments appear to connect  
516 parallel AFBs to generate constrictive forces that pull microridges closer together (van Loon et  
517 al., 2021). A similar mechanism could be operating during seam narrowing.

518

519 Seam narrowing also coincides with increased anisotropy of CFBs in hyp7 that appear to  
520 connect to the longitudinal AFBs and AJs. Local polymerization and upward extension of actin  
521 filaments can generate pushing forces at AJs (Efimova and Svitkina, 2018; Li et al., 2020;  
522 Papalazarou and Machesky, 2021). In theory, hyp7 CFBs could generate lateral pushing forces  
523 that also contribute to seam narrowing.

524

525 We found no evidence that forces associated with seam narrowing buckle the apical  
526 membrane to pattern ridge-like structures. In all ten TEM specimens examined, including those  
527 with very small, nascent alae, the seam plasma membrane appears smooth.

528

### 529 **Differential separation vs. adhesion of provisional matrix layers initiates alae formation**

530 The provisional matrix is a temporary enclosure composed of several ZP-domain  
531 proteins (LET-653, NOAH-1, FBN-1), putative lipid transporters (LPR-3), and other still unknown

532 matrix components that infiltrate beneath the cuticle. Many components of the provisional matrix  
533 are deposited on the apical surface of both the seam and hyp7 syncytia prior to and during the  
534 period of seam narrowing (Fig. 11B). Importantly, none of the matrix factors studied here are  
535 unique to the seam, yet they organize into alae-like structures only in this location.

536

537 Newly deposited matrix over the seam initially appears unpatterned, and actin is  
538 required for its subsequent organization into longitudinal bands (Fig. 11B). Ultrastructurally, the  
539 first sign of band patterning is the appearance of four evenly spaced, small separations between  
540 provisional matrix layers. The position of these initial matrix separations closely matches those  
541 of the four underlying seam AFBs present during seam relaxation. These separations will  
542 eventually define the valleys surrounding the adult alae, while the three intervening areas of  
543 remaining matrix adhesion define the adult alae ridges themselves. In the absence of LET-653,  
544 alae ridges vs. valleys appear poorly demarcated, consistent with a key role for the provisional  
545 matrix in subregion establishment.

546

547

#### 548 **Relay of the seam AFB pattern to the provisional matrix**

549 If the longitudinal AFBs do not push up on or buckle the seam apical membrane, then  
550 how are AFB patterns transmitted to the aECM? We propose that AFBs provide a downward  
551 pulling force that leads to separations in the matrix layers directly above them (Fig. 11B). This  
552 model requires that AFBs and the provisional matrix be somehow connected across the apical  
553 plasma membrane. In hyp7 at later stages, the actin cytoskeleton connects to cuticle aECM via  
554 matrilin-related proteins (Bercher et al., 2001; Hong et al., 2001). Distinct but analogous linkers  
555 may connect the actin cytoskeleton to the provisional aECM over the seam. This mechanical  
556 connection model does not need to invoke actomyosin contractility of the AFBs to explain the  
557 pulling mechanism; rather, as long as a physical connection is present, the motion of the worm's  
558 body could generate sufficient tugging forces on the matrix overlying the AFBs.

559

560 A second, not mutually exclusive, possibility is that AFBs direct secretion of matrix  
561 proteases or other factors that modify the matrix at specific overlying sites. In *Drosophila*, NM II-  
562 mediated actomyosin contraction facilitates docking and compaction of large vesicles that  
563 deliver several aECM components to cell surfaces (Rousso et al., 2016), and cortical actin  
564 filaments are thought to specify sites of chitin synthase accumulation for chitin extrusion  
565 (Öztürk-Çolak et al., 2016). Longitudinal AFBs could serve a similar secretory role in the seam.

566 However, we have not yet observed any evidence for patterned deposition of seam matrix  
567 factors or for patterned release of the EVs seen by TEM.

568

569 A key feature of the above models is that initially unpatterned matrix factors organize  
570 into longitudinal bands in response to an initiating cue from seam AFBs. Once the process is set  
571 in motion, self-organizing properties of the matrix may re-enforce the initial differences. For  
572 example, we propose that intrinsic biophysical properties could cause each protein to segregate  
573 preferentially toward or away from regions of tension, or to adhere preferentially to partners in  
574 different (now separated) layers, thereby establishing alternating matrix subregions with  
575 different molecular contents (Fig. 11B).

576

### 577 **The provisional matrix as a scaffold for permanent matrix assembly**

578 Once the provisional matrix pattern is established, the next challenge is to grow and  
579 shape the alae ridges, while gradually replacing the provisional matrix with more permanent  
580 cuticle components such as collagens. *C. elegans* expresses more than 170 predicted cuticle  
581 collagen genes (Page and Johnstone, 2007), but so far very little is known about the collagen  
582 (or other matrix) content of adult alae. The cuticulins important for L1 or dauer alae formation do  
583 not seem to play a role in adults (Sapio et al., 2005). We hypothesize that binding interactions  
584 between specific provisional matrix factors and specific permanent matrix factors ultimately  
585 recruit different sets of factors to the alae ridges vs. valleys, thereby propagating the provisional  
586 matrix patterns to the permanent matrix.

587

588 Our TEM data suggest that alae enlargement is preceded by a burst of exocytosis that  
589 fills the developing matrix region over the seam with EVs of varying size. Seam EVs were  
590 previously suggested to release hedgehog-related cargos (Liegeois et al., 2006), and we  
591 hypothesize that EVs could also be a major route by which other types of matrix cargo or  
592 proteases are delivered to the alae. Many of the EVs appear to derive from hyp7, so one role of  
593 seam narrowing could be to facilitate dumping of contents from hyp7 into a narrow extracellular  
594 space over the seam. Some of the larger EVs resemble migrasomes (Ma et al., 2015) and might  
595 simply be debris left behind by hyp7 as it begins to withdraw during seam relaxation. Once more  
596 permanent alae components are identified, it will be interesting to test if they are trafficked  
597 through EVs and to investigate how the processes of matrix delivery, infiltration, and  
598 replacement occur.

599

600           A key conclusion from this study is that provisional matrix proteins can play critical roles  
601 in shaping a permanent aECM structure even when these proteins are not present in that final  
602 structure. Provisional matrices likely are important intermediates in forming and shaping other  
603 permanent aECM structures too. For example, in *Drosophila*, a temporary luminal matrix  
604 precedes formation of a distinct chitin-rich cuticle within tracheal tubes (Ozturk-Colak et al.,  
605 2015). A dramatic example of a provisional matrix in mammals is that of tooth enamel, which  
606 initially contains many matrix proteins, most of which are removed and replaced by calcium  
607 phosphate during the process of mineralization (Moradian-Oldak and George, 2021). In cases  
608 where the final aECM structure must be rigid enough to retain its shape, it makes sense to  
609 pattern a more malleable provisional matrix first and then to use that matrix as a scaffold or  
610 mold on which to build the permanent structure.

611

612

613

## 614 MATERIALS AND METHODS

615

### 616 Strains and Transgenes

617 *C. elegans* strains used in this study are listed in Table S1. Strains were maintained under  
618 standard conditions (Brenner, 1974) and cultivated at either 20°C or 25°C, as indicated in Figure  
619 legends. For synchronization, gravid worms were allowed to lay eggs during limited time  
620 windows or were bleached to isolate eggs and hatchlings arrested in starvation-induced L1  
621 diapause and were released from diapause by plating on NGM seeded with *E. coli* OP50-1. The  
622 precise stages of L4 worms were further determined based on the shape of the vulva (Cohen et  
623 al., 2020; Mok et al., 2015).

624 Strains with conditional *nmy-2* alleles were propagated at permissive temperature (15°C)  
625 and cultivated at restrictive temperature (25°C) following release from starvation-induced L1  
626 diapause. *let-653* mutant defects were examined in animals rescued to viability with a transgene  
627 driven by the excretory duct-specific promoter *lin-48* (Johnson et al., 2001). *lpr-3* seam mosaics  
628 were obtained from transgenic strain UP3452 [*lpr-3(cs231); csEx436 [lpr-3+; myo-2::mCherry]*];  
629 potential mosaics were recognized based on loss of the transgene-associated *myo-2::mCherry*  
630 signal in one or more of the three pharyngeal muscle 3 (pm3) cells, two of which derive from the  
631 ABa lineage and thus are lineally-related to seam cells (Sulston and Horvitz, 1977). 10/15 such  
632 mosaics had alae defects, compared to only 1/21 non-mosaic siblings (p=0.0001, Fisher's Exact  
633 Test).

634 Table S2 describes the oligonucleotides used in this study. Phusion High Fidelity  
635 Polymerase (NEB) was used to amplify DNA for sequencing and cloning. Gibson assembly  
636 (NEB) and standard cloning reactions were used to construct fusion genes and corresponding  
637 plasmids. To create the *egl-18p::rde-1+ egl-18p::rde-1::sl2::mCherry::unc-54* 3'UTR fusion gene  
638 housed in pSK08, the promoter of *egl-18*, which corresponds to nucleotides 1910072-1913471  
639 of chromosome IV (GenBank: NC\_003282); the coding region of *rde-1*, which corresponds to  
640 nucleotides 9988043-9991614 of chromosome V (GenBank: NC\_003283); coding sequence for  
641 *mCherry* (GenBank: KT175701), *sl2* (GenBank: LK928133); and the *unc-54* 3'UTR cassette  
642 from pPD95.75 were combined. To construct the *dpy-7p::rde-1+ dpy-7p::rde-1::sl2::nls-gfp::unc-*  
643 *54* 3'-UTR fusion gene housed in pSK38, the minimal promoter of *dpy-7*, which corresponds to  
644 nucleotides 7537789-7537869 and 7537914-7538219 of chromosome X (GenBank:  
645 NC\_003284); the coding region of *rde-1*; *SL2*; and the *nls-gfp::unc-54* 3'UTR cassette from  
646 pPD95.73 were united. To construct the *dpy-7p::utrnc::dsRed::unc-54* 3'UTR fusion gene  
647 housed in pSK26, the promoter of *dpy-7* (as above); the coding sequence for the first CH

648 domain (residues 1-261) of human Utrophin (GenBank: LX69086); the coding sequence for  
649 *dsRed* (GenBank: HQ418395); the *unc-54* 3' UTR cassette from pPD95.81; and the pUC57  
650 backbone were combined. To construct the *egl-18p::utrnc::gfp::unc-54* 3' UTR fusion gene  
651 housed in pSK34, the promoter of *egl-18*; the sequence encoding UTRNCH; and the *gfp::unc-*  
652 *54* 3' UTR cassette and backbone from pPD95.81 were united. All variants of plasmid pPD95  
653 were gifts from Andy Fire.

654 To construct the *noah-1::sfGFP::noah-1* translational fusion gene housed in pCM05,  
655 regulatory and coding regions of *noah-1* were amplified from genomic DNA (nucleotides  
656 5874389-5883950 of chromosome I, GenBank: LK927608) and cloned into a NotI-filled derivative  
657 of pCR-Blunt II-TOPO (Invitrogen). A *NotI-sfgfp-NotI* cassette was inserted in-frame between  
658 the codons for P624 and V625 of *noah-1a* (Genbank: NM\_170870). The corresponding NotI site  
659 was created using a Q5 mutagenesis kit (Invitrogen). Superfolder (sf) GFP was isolated from  
660 pCW11 (Max Heiman, Harvard University).

661 All extrachromosomal arrays were generated by microinjection of young adults with mixtures  
662 containing 100ng/μl DNA. To generate *aaaEx37*, pSK08 (5ng/μl), *ttx-3::gfp* (40ng/μl), and  
663 pRS316 (55ng/μl) were co-injected into JK537 *rde-1(ne219)*. To generate *aaaEx162*, pSK38  
664 (5ng/μl), *ttx-3::dsred* (40ng/μl) and pRS316 were co-injected into JK537. To generate  
665 *aaaEx108*, pSK26 (0.5ng/μl), *ttx-3::gfp*, and pRS316 were co-injected into N2. To generate  
666 *aaaEx117*, pSK34 (5ng/μl), *ttx-3::gfp*, and pRS316 were co-injected into N2. Optimal plasmid  
667 concentrations used to generate tandem *utrnc* arrays were empirically determined by titration.  
668 UTRNCH signals were readily detected in the resulting transgenic animals, while phenotypes  
669 associated with high levels of UTRN were not observed. To generate *aaaEx78 [fl-fbn-*  
670 *1::mCherry::fbn-1]*, pSK27 (2.5 ng/μl), the above-mentioned PCR product (1.15 ng/μl), *ttx-*  
671 *3p::gfp*, and pRS316 were co-injected into N2. To generate *aaaEx167*, pCM05 (1ng/μl), *ttx-*  
672 *3::dsred*, and pRS316 were co injected into ARF379. Resulting transgenic lines were out-  
673 crossed to N2 to remove *aaals12*. The extrachromosomal arrays *aaaEx78* and *aaaEx167*  
674 rescued lethality caused by respective null alleles of *fbn-1* or *noah-1*, confirming the production  
675 of functional fusion proteins. Extrachromosomal arrays were integrated into the genome by UV  
676 irradiation at 450 kJ using an FB-UVXL-1000 (Fisher Scientific). Strains with newly integrated  
677 arrays were back crossed to JK537 or N2 4 to 6 times prior to further analyses.

678

### 679 RNA-mediated interference (RNAi)

680 Bacterial-mediated RNAi was performed as described (Kamath et al., 2003), except that  
681 NGM (nematode growth medium) plates were supplemented with 8mM rather than 1mM,

682 isopropyl  $\beta$ -D-1-thiogalactopyranoside (IPTG). For attenuated RNAi treatments, animals were  
683 washed off from control plates 14hrs after release from L1 diapause with 14 ml M9, rotated for  
684 30 minutes in M9 to remove residual gut bacteria and then transferred to experimental RNAi  
685 plates. As a control, worms were fed the same *E. coli* HT115(DE3) transformed with the empty  
686 vector pPD129.36. Upon induction by IPTG, such bacteria produce short dsRNA molecules that  
687 do not match any annotated gene of *C. elegans*.

688 To knock down *actin* by bacterial-mediated RNAi, we used a sequence-verified clone for  
689 *act-2* present in the Ahringer library (Kamath et al., 2003). To knock down *nmy-1* (Genbank:  
690 LK927643), 1121 bp of genomic DNA from exon 10 was cloned into pPD129.36, the standard  
691 expression vector for dsRNAs. For *zoo-1* (GenBank: NM\_001026515), cDNA spanning exons  
692 1–7 was cloned into pPD129.36, as previously described (Lockwood et al., 2008). For *noah-1*  
693 (GenBank: LK927608), 1024bp from exon 6 was cloned into pPD129.36. Each of the resulting  
694 plasmids (pSK43, pSK44 and pCM13) was verified by Sanger sequencing and used to  
695 transform *E. coli* strain HT115(DE3).

696

#### 697 **Dil Staining of Cuticles**

698 Dil staining to visualize cuticle structures was performed essentially as described (Schultz  
699 and Gumienny, 2012). Briefly, approximately 600 adult worms were incubated in 400  $\mu$ l of 30  
700  $\mu$ g/mL Dil (Sigma) in M9 for 3 hours, shaking at 350 rpm. Worms were then washed 1X in M9  
701 buffer, re-suspended in 100  $\mu$ l of M9, and dispensed to a 6-cm NGM plate seeded with *E. coli*  
702 OP50-1. To remove excess unbound dye, worms were allowed to crawl on the plate for 30  
703 minutes prior to imaging.

704

#### 705 **Microscopy and Image Analyses**

706 Worms were anesthetized with sodium azide (2.5%) and/or levamisole (10 mM) in M9 buffer  
707 and mounted on 2% agarose pads. A Zeiss Axioplan or Axioskop microscope (Carl Zeiss  
708 Microscopy) with an attached Hamamatsu Orca ER CCD camera or Leica DFC360 FX camera  
709 was used for compound microscopy. Images were acquired and analyzed using the software  
710 packages Volocity 6.3 (PerkinElmer) or Qcapture (Qimaging). The confocal images in Figs. 2, 4,  
711 5C, were captured on a Zeiss LSM5 controlled by ZEN 9.0 software. Images in Fig. 3 and the  
712 NOAH-1 and FBN-1 images in Fig. 7, were captured on a Zeiss LSM880 with Airyscan  
713 processing; the dual colors image in Fig. 7D and Fig. 8C were captured on the same instrument  
714 with spectral analysis and signals from dsRed and GFP then linear unmixed in Zen 9.0.  
715 Confocal images of LET-653 and LPR-3 in Fig. 7B were captured with Leica TCS SP8 confocal



716 microscope. Confocal images in Figs. 5A,B and 8A,C were captured with a Leica DMI8 confocal  
717 microscope. Image intensity and color were adjusted in FIJI or Photoshop for presentation.

718 Alae defects were quantified using a scoring rubric that prioritized regions of disorganized  
719 alae over gaps where alae were completely missing; animals that displayed each phenotype in  
720 different body regions were placed in the former category.

721 Measurements were made using Volocity 6.3 (PerkinElmer), ImageJ (Version 1.48v, NIH),  
722 and Fiji (Schindelin et al., 2012). Seam width was measured in Fiji as the distance between AJM-  
723 1-marked junctions; six measurements at 100-point intervals were made per image and averaged.  
724 For NM II knockdown experiments, where seam shape was too abnormal for standard width  
725 measurements, normalized seam width was calculated based on seam area (surface area within  
726 AJM-1::mCHERRY boundaries, measured in Volocity), divided by the distance imaged along the  
727 A-P axis. The ImageJ plugin FibrilTool was used to measure CFB anisotropy {Boudaoud, 2014  
728 #3}. For each worm assayed, 6 values were obtained by subdividing the lateral region of hyp7  
729 into 3 dorsal and 3 ventral ROIs, each approximately 400  $\mu\text{m}^2$ . Line scans in Fig. 8 were  
730 performed on raw images using a 10pt line and the PlotProfile tool in FIJI.

731 For transmission electron microscopy (TEM), synchronized wild-type (N2) and *let-653* mutant  
732 (UP3342) L4 animals were collected and processed by high pressure freezing followed by freeze  
733 substitution into osmium tetroxide in acetone (Hall et al., 2012; Weimer, 2006). Specimens were  
734 rinsed and embedded into LX112 resin and cut transversely to generate thin sections of  
735 approximately 70 nm each. At least two sections each from two different mid-body regions were  
736 sampled per animal. Sections were stained with uranyl acetate and lead citrate and observed on  
737 a JEM-1010 (Jeol, Peabody Massachusetts) transmission electron microscope. Images were  
738 processed in ImageJ and manually pseudocolored in Adobe Illustrator (Adobe, San Jose  
739 California). We imaged a total of n=10 N2 and n=2 UP3342 specimens.

740

## 741 **Statistical Analyses**

742 GraphPad Prism 6 and Microsoft Excel 15.21 were used for statistical analyses. In all dot-  
743 plots or bar graphs, lines and error bars indicate the mean and standard deviation, and dots  
744 represent mean measurements from individual animals. To perform statistical analyses on  
745 categorical data, phenotypic categories were combined such that outcomes were classified as  
746 abnormal versus superficially normal (Figs. 2 and 6).

747

748



749 **ACKNOWLEDGEMENTS**

750 Some strains used in this study were provided by the *Caenorhabditis* Genetics Center, which is  
751 funded by the NIH Office of Research Infrastructure Programs (P40 OD010440). We are  
752 grateful to Margot Quinlan, Alvaro Sagasti, Larry Zipursky, Ron Ellis, and members of our  
753 laboratories for helpful discussions. We also thank Helen Schmidt and Nick Serra for critical  
754 reading of the manuscript, and Michel Labouesse, Margot Quinlan, John Kim, Eric Miska, and  
755 David Sherwood for sharing reagents. This work was supported by the National Science  
756 Foundation (IOS1258218 to ARF), the National Institutes of Health (R01GM125959 and  
757 R35GM136315 to MVS, OD010943 to DHH, and training awards GM007185 to SK and T32  
758 AR007465 to JDC), and by a Dissertation Year Fellowship from the UCLA Graduate Division (to  
759 SK).

760 **FIGURE LEGENDS**

761

762

763 **Figure 1. Timeline of adult alae formation.** A) L4-to-Adult development. Top schematics show  
764 anatomy of the seam and hyp7 syncytia. Bottom schematics show apical matrices. The  
765 provisional matrix (teal) is secreted beneath the L4 cuticle (gray) prior to, or during, synthesis of  
766 the new adult cuticle (black). B) Lateral view of the adult cuticle. Micrographs show adult alae as  
767 visualized by Dil staining and DIC. Magenta lines indicate dark bands corresponding to valleys  
768 in both the Dil and DIC images. Scale bar: 5  $\mu$ m. C) Transverse view of adult. Cartoon (top)  
769 shows how alae are positioned relative to the seam and hyp7 syncytia. Transmission electron  
770 micrograph (bottom) shows the three alae ridges (yellow arrowheads). The underlying seam  
771 syncytium is false colored in blue. Scale bar: 500 nm. D) When viewed by DIC imaging, alae on  
772 the developing adult cuticle gradually became visible underneath the L4 cuticle. Brackets  
773 indicate regions above seam syncytia where longitudinal ridges could be detected. N2 animals  
774 were grown at 20°C and staged based on vulva tube morphology (Mok et al., 2015). Images are  
775 representative of at least n=10 animals per stage. Scale bars: 5  $\mu$ m.

776

777

778 **Figure 2. Knockdown of actin, NM II, or AJ components results in alae disorganization**

779 A) Tissue-specific and whole animal actin knockdowns (strains JK537, ARF330, ARF408, N2,  
780 25°C). B) NM II mutants and knockdowns (strains WM179, WM180, 25°C). For both A and B,  
781 representative DIC images show structures on the lateral surface of young adults of indicated  
782 genotypes. White brackets demarcate the region of interest. Yellow and magenta lines label  
783 presumptive ridges and adjacent valleys in normal alae. Arrows point to tortuous structures;  
784 arrowheads, minor deformities. Asterisk labels large gap. Green bracket labels severely  
785 disorganized region with no obvious ventral boundary. C) Dil staining of the cuticle in actin and  
786 NM II knockdowns. D) Prevalence of deformed alae. Values are weighted averages from two  
787 independent trials; N: sample size. \*\*\* P<0.001 for all pairwise comparisons of prevalence of  
788 seemingly normal alae in knockdowns and mock-treated specimens; Fisher's exact test with  
789 Bonferroni's correction for multiple comparisons. E-F) AJ mutants or knockdowns (strains N2  
790 and PE97, 25°C), and prevalence of deformed alae, as above. \*\*\*P < 0.001. Scale bars: 5  $\mu$ m.

791

792

793 **Figure 3. Transient narrowing of seam syncytia and formation of longitudinal AFBs**  
794 **precede the appearance of alae.** A) Diagram depicting seam (magenta) and *hyp7* syncytia in  
795 an L4 larva. Green, apical junctions between syncytia. Red box indicates region of interest  
796 (ROI) imaged below. B) Representative confocal projections show *UTRNCH::GFP* (magenta)  
797 and *AJM-1::mCHERRY* (green) signals captured at the indicated stages (strain ARF404, 25°C).  
798 Yellow lines label AFBs along dorsal and ventral seam margins; dashed lines, medial AFBs.  
799 Arrows point to AJs between seam (s) cell cousins about to fuse. Chevrons point to spikes of  
800 F-actin crossing AJs. C) Quantification of apical width of seam syncytia at indicated stages  
801 (strain SU93, 20°C). Values are the distance between *AJM-1::GFP* marked AJs, representing  
802 the mean of 6 measurements per worm. Bars: mean and s.d. \*P ≤ 0.05, \*\*P ≤ 0.01; Mann-  
803 Whitney test. D) Enlarged ROIs delineated by brackets in (B). Scale bars: 5 μm.

804

805 **Figure 4. Assembly of both longitudinal and circumferential AFBs in *hyp7* precede the**  
806 **appearance of alae.** A) Confocal fluorescence maximum-intensity projections (left) show  
807 F-actin (*UTRNCH::dsRED*) detected in the lateral (thick) region of *hyp7* syncytia. Digitally  
808 enlarged ROIs show F-actin by the lateral margins (strain ARF385, 25°C except for L4.2  
809 specimen, 20°C). Arrowheads point to F-actin at margins. Arrows point to circumferential AFBs.  
810 B) Quantitation of anisotropy of F-actin signals in lateral *hyp7*. Values represent 6 ROIs from 3-  
811 10 specimens per timepoint (relative to emergence in L4) or stage. \*\*\*\*P ≤ 0.0001, <sup>n.s.</sup>P > 0.05;  
812 Ordinary one-way ANOVA with Tukey's correction.

813

814 **Figure 5. Seam narrowing and coherence of AFBs depend on NM II A)** Endogenous  
815 *NMY-2::GFP* aligns with junctional AFBs at the seam-*hyp7* margins and with the medial AFB in  
816 narrowed (L4.3-L4.4) seam syncytia (strain ARF500 20°C). AFBs were marked by  
817 *egl-18::UTRNCH::dsRed*. B) Endogenous *NMY-1::GFP* also faintly marks the seam-*hyp7*  
818 margins (Strain ML2540, 20°C). Both A and B show single confocal slices representative of at  
819 least n=6 animals per stage, imaged at 20°C. C) NM II knockdown disrupts seam shape and  
820 medial AFBs. Representative confocal maximum projections show F-actin and AJs detected  
821 near the surface of seam syncytia at L4.4 (strain ARF404, 25°C). Solid lines label junctional  
822 AFBs; dashed lines, medial AFBs. Arrows point to protrusions of the seam over *hyp7*. Asterisks  
823 label aggregated F-actin. Arrowheads point to fragmented medial AFBs. Scale bar: 5 μm. D)  
824 Quantitation of seam width — values represent area surrounded by AJs normalized to imaged  
825 interval. Images and measurements from two independent trials; total sample sizes as

826 indicated. Bars signify mean and s.d. \*\*\* $P \leq 0.001$ , \* $P \leq 0.05$ ; unpaired t-tests with Bonferroni's  
827 correction. For C and D, strains expressed *egl-18::UTRNCH::GFP* and *AJM-1::mCHERRY*.

828

829 **Figure 6. Provisional matrix components are required for patterning the alae**

830 A) DIC images of alae in RNAi knockdowns or mutants of the indicated genotypes (strains N2,  
831 ARF251, 25°C; Strains UP3184, UP3452, 20°C). Arrows indicate disorganized regions.  
832 Asterisks indicate small breaks or gaps. Bracket indicates a large gap where no alae are  
833 present. B) Quantification of alae defects, as in Fig. 2D. \*\*\*\* $P < 0.0001$ , Fisher's exact test. ^Data  
834 reproduced from (Forman-Rubinsky et al., 2017). #Numbers here are an under-estimate of the  
835 true penetrance of alae defects because not all mosaics would have lost *lpr-3* in the seam  
836 lineage (see Methods). H-J) At L4.4 stage, seam width (visualized with *AJM-1::GFP*) is similar  
837 between H) *WT* (strain SU93) and I) *let-653(cs178)* mutants (strain UP3184), both at 20°C.  
838 Measurements were performed as in Fig. 3B, and *WT* datapoints for the L4.4 stage are  
839 combined between both experiments. ns,  $P > 0.05$ , Mann-Whitney test.

840

841 **Figure 7. Provisional matrix patterns presage the ridges and valleys of adult-stage alae**

842 A) Diagrams of provisional matrix components. B) Representative confocal slices show the  
843 dynamic distributions of indicated fusions in animals from mid- to late-L4. *LET-653::SfGFP*  
844 (strain UP3746, 20°C). *SfGFP::LPR-3* (strains UP3666 or UP3693, 20°C). *NOAH-1::SfGFP*  
845 (strain ARF503 25°C). *FBN-1::mCHERRY* (strain ARF379, 25°C). C) Apical and sub-apical  
846 confocal slices from the same animal, showing the different *NOAH-1::SfGFP* patterns in  
847 different z-planes (strain CM10, 25°C). Some animals showed only one of these patterns, and  
848 others showed both simultaneously. Schematic shows interpretation of apical patterns as alae  
849 ridges and sub-apical patterns as valleys. Correspondingly, on all micrographs, yellow lines  
850 indicate developing alae ridges and white lines indicate flanking valleys. D) Airyscan-processed  
851 images of late L4s, showing that apical *NOAH-1* aligns with alae ridges and sub-apical *FBN-1*  
852 aligns with valleys, as seen by DIC. Image at right is a maximum-intensity projection showing  
853 *FBN-1::mCHERRY* and *NOAH-1::SfGFP* (strain ARF502 25°C) in different regions. All images  
854 are representative of at least  $n=5$  per marker per stage. Scale bars: 5  $\mu\text{m}$ .

855

856 **Figure 8. Actin is required to pattern the provisional matrix**

857 A-D) Spatial relationships between seam AFBs and provisional matrix bands. A,C) Maximum  
858 intensity projections of animals expressing the designated actin sensor and matrix fusion.  
859 Brackets indicate seam region. Arrows point to medial AFBs. B,D) Line traces across the yellow

860 bar region in raw versions of the corresponding images to left. Intensities for the two channels  
861 are plotted on separate scales as indicated. Grey shading represents the location of AFBs.  
862 Arrows point to medial AFB locations. A,B) SfGFP::LPR-3 apical bands are largely offset from  
863 AFBs (strain UP4127, 20°C). n=7 L4.3-L4.4. n= 8 L4.5-L4.7. The latter number includes only  
864 specimens where the UTRNCH::dsRed sensor detected medial AFBs in addition to junctional  
865 AFBs. C,D) NOAH-1::SfGFP apical bands are largely offset from AFBs (Strain UP4114, 20°C).  
866 n=6 L4.3-L4.4, n=10 L4.7-L4.8. E) *actin RNAi* disrupts provisional matrix patterns. Standard  
867 methods for bacterially-induced *actin RNAi* were used, and surviving animals were imaged at  
868 the L4.5-L4.7 stage (Strain UP3666, 20°C). F) Quantitation of SfGFP::LPR-3 patterns after actin  
869 depletion. Scale bars: 5 µm.

870

871 **Figure 9. Ultrastructure of developing alae reveals differential matrix separation vs.**

872 **adhesion** A-F) TEM micrographs of mid- to late-L4 *wild-type* (N2) specimens arranged by  
873 inferred age (total N=10). Transverse cuts through the mid-body are shown. See Fig. 1C for  
874 cartoon rendering of perspective. Seam cell is false colored in blue. White arrowheads indicate  
875 adherens junctions between the seam and hyp7 syncytia. Scale bars: 200 nm. A) ~L4.3-L4.4.  
876 The seam cell is highly constricted, with its narrowest point ~500nm in width. Black arrowheads  
877 indicate electron dense provisional matrix material on apical surfaces of both seam and hyp7  
878 syncytia. B) ~L4.4-L4.5. Magenta arrowheads indicate four regions of provisional matrix  
879 separation. Asterisk marks a vesicle in transit across seam membrane. C) ~L4.4-L4.5. Yellow  
880 arrowheads indicate three regions of provisional matrix adhesion at nascent alae tips.  
881 Extracellular vesicles (asterisks) are present in the matrix over hyp7. C') Regions of matrix  
882 separation are enlarged compared to panel C, which is another body region from the same  
883 specimen. Many extracellular vesicles (asterisks) and a larger membrane-bound structure  
884 (arrow) are present within the future adult cuticle. D) ~L4.6-L4.7. Discernable alae ridges have  
885 formed and contain electron dense material at their tips. Matrix fibrils connect these ridges to  
886 the L4 cuticle, while additional L4-cuticle-attached matrix protrudes down into the intervening  
887 gaps. E) ~L4.8. Maturing alae have grown in length and width, and valleys have narrowed. The  
888 central ridge still maintains a discernable connection to the L4 cuticle.

889

890

891 **Figure 10. The provisional matrix component LET-653 is required for patterned adhesion**  
892 **versus separation of matrix layers.** A-C) TEM micrographs of *let-653(cs178)* (A,B, strain  
893 UP3342) or wild-type (C, N2) L4 specimens. Transverse cuts through the mid-body are shown.  
894 Seam cell is false colored in blue. Scale bars: 200 nm. Boxed regions are shown at higher  
895 magnification in A'-C'. A, A') There is no clear distinction of adhesive vs. separated matrix  
896 regions in this mid-L4 *let-653* specimen, despite the appearance of nascent alae ridges. B, B')  
897 Mis-shapen alae ridges have completely separated from the L4 cuticle of this late L4 *let-653*  
898 specimen. Large vesicle structures (yellow arrows) fill the seam cell. C, C') Many lysosomes or  
899 related lamellar organelles (white arrows) appear within the seam cell in wild-type late L4  
900 specimens (N=4).

901

902

903 **Figure 11. A mechanical relay model for development of the adult alae**

904 Seam is blue, hyp7 peach. Cortical actin networks depicted in red, and NM II in yellow.

905 **A)** Graphical representation of cortical actin networks across the larval-to-adult transition.

906 Arrows indicate constrictive forces within the seam or pushing forces from hyp7 that lead to

907 transient seam narrowing. (1) Epidermis prior to cortical actin network assembly; (2) Seam

908 narrowing; (3) Seam relaxation. (4) Cortical actin network disassembly. **B)** Graphical

909 representation of transverse cross-sections through the seam, hyp7, and overlying matrices

910 during early (left) and late (right) stages of alae formation. (Early) Unknown connections link

911 AFBs (red) to the overlying provisional matrix (purple). Pulling forces (arrows) from these

912 connections generate small splits between molecularly distinct provisional matrix layers. (Late)

913 As alae take shape, distinct provisional matrix components (purples, magenta) and cuticle

914 components (grey) accumulate within different subdomains.

915

916

917 **SUPPLEMENTAL MATERIALS**

918

919 **Supplemental Figure 1. Outlier wild-type L4 TEM specimen with broken and buckled**  
920 **cuticle**

921 Cuticle breaks may release mechanical tension and allow buckling of matrix over the seam.  
922 Seam is false colored in blue. Boxes indicate regions shown in panels to right. A, A') TEM  
923 section through a mid-body region far from the vulva. The cuticle over the seam is arranged into  
924 deep folds. We interpret this cuticle to be that of the mid-L4 stage. Note mature appearance of  
925 the cuticle, small seam cell size, and absence of receding cuticle or lamellar LROs typically  
926 associated with late L4s (compare to sibling specimens in Figs. 9 and 10). B, B') TEM section  
927 through the vulva region of the same specimen. A large break in the L4 cuticle is present at the  
928 vulva, which has a large lumen characteristic of mid-L4s and no signs yet of adult cuticle  
929 formation. Note connection of dorsal vulva cells to the seam and distortion of seam cell shape in  
930 this region. Scale bars: 5  $\mu\text{m}$ .

931

932 **Supplemental Table 1:** *C. elegans* strains used in this study.

933

934 **Supplemental Table 2:** Oligonucleotides used in this study.

935

936



937 **References**

938

939 **Baird, G. S., Zacharias, D. A. and Tsien, R. Y.** (2000). Biochemistry, mutagenesis, and  
940 oligomerization of DsRed, a red fluorescent protein from coral. *Proc. Natl. Acad. Sci. U.*  
941 *S. A.* **97**, 11984–11989.

942 **Bercher, M., Wahl, J., Vogel, B. E., Lu, C., Hedgecock, E. M., Hall, D. H. and Plenefisch, J.**  
943 **D.** (2001). *mua-3*, a gene required for mechanical tissue integrity in *Caenorhabditis*  
944 *elegans*, encodes a novel transmembrane protein of epithelial attachment complexes. *J.*  
945 *Cell Biol.* **154**, 415–426.

946 **Brenner, S.** (1974). The genetics of *Caenorhabditis elegans*. *Genetics* **77**, 71–94.

947 **Burkel, B. M., von Dassow, G. and Bement, W. M.** (2007). Versatile fluorescent probes for  
948 actin filaments based on the actin-binding domain of utrophin. *Cell Motil. Cytoskeleton*  
949 **64**, 822–832.

950 **Cohen, J. D. and Sundaram, M. V.** (2020). *C. elegans* Apical Extracellular Matrices Shape  
951 Epithelia. *J. Dev. Biol.* **8**, E23.

952 **Cohen, J. D., Flatt, K. M., Schroeder, N. E. and Sundaram, M. V.** (2019). Epithelial Shaping  
953 by Diverse Apical Extracellular Matrices Requires the Nidogen Domain Protein DEX-1  
954 in *Caenorhabditis elegans*. *Genetics* **211**, 185–200.

955 **Cohen, J. D., Sparacio, A. P., Belfi, A. C., Forman-Rubinsky, R., Hall, D. H., Maul-Newby,**  
956 **H., Frand, A. R. and Sundaram, M. V.** (2020). A multi-layered and dynamic apical  
957 extracellular matrix shapes the vulva lumen in *Caenorhabditis elegans*. *eLife* **9**, e57874.

958 **Costa, M., Draper, B. W. and Priess, J. R.** (1997). The role of actin filaments in patterning the  
959 *Caenorhabditis elegans* cuticle. *Dev. Biol.* **184**, 373–84.

960 **Costa, M., Raich, W., Agbunag, C., Leung, B., Hardin, J. and Priess, J. R.** (1998). A  
961 putative catenin-cadherin system mediates morphogenesis of the *Caenorhabditis elegans*  
962 embryo. *J Cell Biol* **141**, 297–308.

963 **Cox, G. N.** (1981). The cuticle of *Caenorhabditis elegans* II: Stage-specific changes in  
964 ultrastructure and protein composition during postembryonic development. *Dev Biol* **86**,  
965 456–470.

966 **Dickinson, D. J., Ward, J. D., Reiner, D. J. and Goldstein, B.** (2013). Engineering the  
967 *Caenorhabditis elegans* genome using Cas9-triggered homologous recombination. *Nat.*  
968 *Methods* **10**, 1028–34.

969 **Ding, S. S. and Woollard, A.** (2017). Non-muscle myosin II is required for correct fate  
970 specification in the *Caenorhabditis elegans* seam cell divisions. *Sci. Rep.* **7**, 3524.



- 971 **Doyle, L. M. and Wang, M. Z.** (2019). Overview of Extracellular Vesicles, Their Origin,  
972 Composition, Purpose, and Methods for Exosome Isolation and Analysis. *Cells* **8**, E727.
- 973 **Efimova, N. and Svitkina, T. M.** (2018). Branched actin networks push against each other at  
974 adherens junctions to maintain cell-cell adhesion. *J. Cell Biol.* **217**, 1827–1845.
- 975 **Fernandes, I., Chanut-Delalande, H., Ferrer, P., Latapie, Y., Waltzer, L., Affolter, M.,  
976 Payre, F. and Plaza, S.** (2010). Zona pellucida domain proteins remodel the apical  
977 compartment for localized cell shape changes. *Dev Cell* **18**, 64–76.
- 978 **Flatt, K. M., Beshers, C., Unal, C., Cohen, J. D., Sundaram, M. V. and Schroeder, N. E.**  
979 (2019). Epidermal Remodeling in *Caenorhabditis elegans* Dauers Requires the Nidogen  
980 Domain Protein DEX-1. *Genetics* **211**, 169–183.
- 981 **Forman-Rubinsky, R., Cohen, J. D. and Sundaram, M. V.** (2017). Lipocalins Are Required  
982 for Apical Extracellular Matrix Organization and Remodeling in *Caenorhabditis elegans*.  
983 *Genetics* **207**, 625–642.
- 984 **Gaudette, S., Hughes, D. and Boller, M.** (2020). The endothelial glycocalyx: Structure and  
985 function in health and critical illness. *J. Vet. Emerg. Crit. Care San Antonio Tex 2001* **30**,  
986 117–134.
- 987 **Gill, H. K., Cohen, J. D., Ayala-Figueroa, J., Forman-Rubinsky, R., Poggioli, C., Bickard,  
988 K., Parry, J. M., Pu, P., Hall, D. H. and Sundaram, M. V.** (2016). Integrity of Narrow  
989 Epithelial Tubes in the *C. elegans* Excretory System Requires a Transient Luminal  
990 Matrix. *PLoS Genet.* **12**, e1006205.
- 991 **Gilleard, J. S., Barry, J. D. and Johnstone, I. L.** (1997). cis regulatory requirements for  
992 hypodermal cell-specific expression of the *Caenorhabditis elegans* cuticle collagen gene  
993 *gpy-7*. *Mol. Cell. Biol.* **17**, 2301–11.
- 994 **Goldstein, B. and Nance, J.** (2020). *Caenorhabditis elegans* Gastrulation: A Model for  
995 Understanding How Cells Polarize, Change Shape, and Journey Toward the Center of an  
996 Embryo. *Genetics* **214**, 265–277.
- 997 **Hall, D. H., Hartwig, E. and Nguyen, K. C. Q.** (2012). Modern electron microscopy methods  
998 for *C. elegans*. *Methods Cell Biol.* **107**, 93–149.
- 999 **Hannezo, E., Dong, B., Recho, P., Joanny, J.-F. and Hayashi, S.** (2015). Cortical instability  
1000 drives periodic supracellular actin pattern formation in epithelial tubes. *Proc. Natl. Acad.*  
1001 *Sci. U. S. A.* **112**, 8620–8625.
- 1002 **Harland, D. P. and Plowman, J. E.** (2018). Development of Hair Fibres. In *The Hair Fibre:  
1003 Proteins, Structure and Development* (ed. Plowman, J. E.), Harland, D. P.), and Deb-  
1004 Choudhury, S.), pp. 109–154. Singapore: Springer.

- 1005 **Hong, L., Elbl, T., Ward, J., Franzini-Armstrong, C., Rybicka, K. K., Gatewood, B. K.,**  
1006 **Baillie, D. L. and Bucher, E. A.** (2001). MUP-4 is a novel transmembrane protein with  
1007 functions in epithelial cell adhesion in *Caenorhabditis elegans*. *J Cell Biol* **154**, 403–14.
- 1008 **Johansson, M. E., Sjoval, H. and Hansson, G. C.** (2013). The gastrointestinal mucus system  
1009 in health and disease. *Nat Rev Gastroenterol Hepatol* **10**, 352–61.
- 1010 **Johnson, A. D., Fitzsimmons, D., Hagman, J. and Chamberlin, H. M.** (2001). EGL-38 Pax  
1011 regulates the ovo-related gene *lin-48* during *Caenorhabditis elegans* organ development.  
1012 *Development* **128**, 2857–65.
- 1013 **Kamath, R. S., Fraser, A. G., Dong, Y., Poulin, G., Durbin, R., Gotta, M., Kanapin, A., Le**  
1014 **Bot, N., Moreno, S., Sohrmann, M., et al.** (2003). Systematic functional analysis of the  
1015 *Caenorhabditis elegans* genome using RNAi. *Nature* **421**, 231–237.
- 1016 **Kang, H., Bang, I., Jin, K. S., Lee, B., Lee, J., Shao, X., Heier, J. A., Kwiatkowski, A. V.,**  
1017 **Nelson, W. J., Hardin, J., et al.** (2017). Structural and functional characterization of  
1018 *Caenorhabditis elegans*  $\alpha$ -catenin reveals constitutive binding to  $\beta$ -catenin and F-actin. *J.*  
1019 *Biol. Chem.* **292**, 7077–7086.
- 1020 **Katsanos, D., Ferrando-Marco, M., Razzaq, I., Aughey, G., Southall, T. D. and Barkoulas,**  
1021 **M.** (2021). Gene expression profiling of epidermal cell types in *C. elegans* using  
1022 Targeted DamID. *Dev. Camb. Engl.* **148**, dev199452.
- 1023 **Knight, C. G., Patel, M. N., Azevedo, R. B. R. and Leroi, A. M.** (2002). A novel mode of  
1024 ecdysozoan growth in *Caenorhabditis elegans*. *Evol. Dev.* **4**, 16–27.
- 1025 **Koenderink, G. H. and Paluch, E. K.** (2018). Architecture shapes contractility in actomyosin  
1026 networks. *Curr. Opin. Cell Biol.* **50**, 79–85.
- 1027 **Koh, K. and Rothman, J. H.** (2001). EGL-18 and ELT-6 are required continuously to regulate  
1028 epidermal seam cell differentiation and cell fusion in *C. elegans*. *Dev. Camb. Engl.* **128**,  
1029 2867–2880.
- 1030 **Koppen, M., Simske, J. S., Sims, P. A., Firestein, B. L., Hall, D. H., Radice, A. D., Rongo, C.**  
1031 **and Hardin, J. D.** (2001). Cooperative regulation of AJM-1 controls junctional integrity  
1032 in *Caenorhabditis elegans* epithelia. *Nat. Cell Biol* **3**, 983–991.
- 1033 **Lehrbach, N. J., Armisen, J., Lightfoot, H. L., Murfitt, K. J., Bugaut, A., Balasubramanian,**  
1034 **S. and Miska, E. A.** (2009). LIN-28 and the poly(U) polymerase PUP-2 regulate *let-7*  
1035 microRNA processing in *Caenorhabditis elegans*. *Nat. Struct. Mol. Biol.* **16**, 1016–1020.
- 1036 **Li, J. X. H., Tang, V. W. and Briehner, W. M.** (2020). Actin protrusions push at apical  
1037 junctions to maintain E-cadherin adhesion. *Proc. Natl. Acad. Sci. U. S. A.* **117**, 432–438.
- 1038 **Liegeois, S., Benedetto, A., Garnier, J. M., Schwab, Y. and Labouesse, M.** (2006). The V0-  
1039 ATPase mediates apical secretion of exosomes containing Hedgehog-related proteins in  
1040 *Caenorhabditis elegans*. *J. Cell Biol.* **173**, 949–61.

- 1041 **Lloyd, V. J. and Nadeau, N. J.** (2021). The evolution of structural colour in butterflies. *Curr.*  
1042 *Opin. Genet. Dev.* **69**, 28–34.
- 1043 **Lockwood, C., Zaidel-Bar, R. and Hardin, J.** (2008). The *C. elegans* zonula occludens  
1044 ortholog cooperates with the cadherin complex to recruit actin during morphogenesis.  
1045 *Curr Biol* **18**, 1333–13337.
- 1046 **Ma, L., Li, Y., Peng, J., Wu, D., Zhao, X., Cui, Y., Chen, L., Yan, X., Du, Y. and Yu, L.**  
1047 (2015). Discovery of the migrasome, an organelle mediating release of cytoplasmic  
1048 contents during cell migration. *Cell Res.* **25**, 24–38.
- 1049 **Martin, A. C. and Goldstein, B.** (2014). Apical constriction: themes and variations on a cellular  
1050 mechanism driving morphogenesis. *Dev. Camb. Engl.* **141**, 1987–1998.
- 1051 **Martin, A. C., Gelbart, M., Fernandez-Gonzalez, R., Kaschube, M. and Wieschaus, E. F.**  
1052 (2010). Integration of contractile forces during tissue invagination. *J. Cell Biol.* **188**, 735–  
1053 749.
- 1054 **Melak, M., Plessner, M. and Grosse, R.** (2017). Actin visualization at a glance. *J. Cell Sci.*  
1055 **130**, 525–530.
- 1056 **Mok, D. Z., Sternberg, P. W. and Inoue, T.** (2015). Morphologically defined sub-stages of *C.*  
1057 *elegans* vulval development in the fourth larval stage. *BMC Dev Biol* **15**, 26.
- 1058 **Moores, C. A. and Kendrick-Jones, J.** (2000). Biochemical characterisation of the actin-  
1059 binding properties of utrophin. *Cell Motil. Cytoskeleton* **46**, 116–128.
- 1060 **Moradian-Oldak, J. and George, A.** (2021). Biomineralization of Enamel and Dentin Mediated  
1061 by Matrix Proteins. *J. Dent. Res.* **100**, 1020–1029.
- 1062 **Munjal, A. and Lecuit, T.** (2014). Actomyosin networks and tissue morphogenesis. *Dev. Camb.*  
1063 *Engl.* **141**, 1789–1793.
- 1064 **Muriel, J. M., Brannan, M., Taylor, K., Johnstone, I. L., Lithgow, G. J. and Tuckwell, D.**  
1065 (2003). M142.2 (cut-6), a novel *Caenorhabditis elegans* matrix gene important for dauer  
1066 body shape. *Dev. Biol.* **260**, 339–351.
- 1067 **Ozturk-Colak, A., Moussian, B. and Araujo, S. J.** (2015). *Drosophila* chitinous aECM and its  
1068 cellular interactions during tracheal development. *Dev Dyn.*
- 1069 **Öztürk-Çolak, A., Moussian, B., Araújo, S. J. and Casanova, J.** (2016). A feedback  
1070 mechanism converts individual cell features into a supracellular ECM structure in  
1071 *Drosophila* trachea. *eLife* **5**, e09373.
- 1072 **Page, A. P. and Johnstone, I. L.** (2007). The cuticle. In *Wormbook* (ed. The *C. elegans*  
1073 Research Community), .

- 1074 **Papalazarou, V. and Machesky, L. M.** (2021). The cell pushes back: The Arp2/3 complex is a  
1075 key orchestrator of cellular responses to environmental forces. *Curr. Opin. Cell Biol.* **68**,  
1076 37–44.
- 1077 **Pasti, G. and Labouesse, M.** (2014). Epithelial junctions, cytoskeleton, and polarity. *Wormbook*  
1078 1–35.
- 1079 **Piekny, A. J., Johnson, J. L., Cham, G. D. and Mains, P. E.** (2003). The *Caenorhabditis*  
1080 *elegans* nonmuscle myosin genes *nmy-1* and *nmy-2* function as redundant components of  
1081 the let-502/Rho-binding kinase and *mel-11*/myosin phosphatase pathway during  
1082 embryonic morphogenesis. *Development* **130**, 5695–704.
- 1083 **Pinto, C. S., Khandekar, A., Bhavna, R., Kiesel, P., Pigino, G. and Sonawane, M.** (2019).  
1084 Microridges are apical epithelial projections formed of F-actin networks that organize the  
1085 glycan layer. *Sci. Rep.* **9**, 12191.
- 1086 **Plaza, S., Chanut-Delalande, H., Fernandes, I., Wassarman, P. M. and Payre, F.** (2010).  
1087 From A to Z: apical structures and zona pellucida-domain proteins. *Trends Cell Biol* **20**,  
1088 524–32.
- 1089 **Podbilewicz, B. and White, J. G.** (1994). Cell fusions in the developing epithelial of *C. elegans*.  
1090 *Dev. Biol.* **161**, 408–24.
- 1091 **Priess, J. R. and Hirsh, D. I.** (1986). *Caenorhabditis elegans* morphogenesis: the role of the  
1092 cytoskeleton in elongation of the embryo. *Dev Biol* **117**, 156–73.
- 1093 **Qadota, H., Inoue, M., Hikita, T., Koppen, M., Hardin, J. D., Amano, M., Moerman, D. G.**  
1094 **and Kaibuchi, K.** (2007). Establishment of a tissue-specific RNAi system in *C. elegans*.  
1095 *Gene* **400**, 166–73.
- 1096 **Rouso, T., Schejter, E. D. and Shilo, B.-Z.** (2016). Orchestrated content release from  
1097 *Drosophila* glue-protein vesicles by a contractile actomyosin network. *Nat. Cell Biol.* **18**,  
1098 181–190.
- 1099 **Sapio, M. R., Hilliard, M. A., Cermola, M., Favre, R. and Bazzicalupo, P.** (2005). The Zona  
1100 Pellucida domain containing proteins, CUT-1, CUT-3 and CUT-5, play essential roles in  
1101 the development of the larval alae in *Caenorhabditis elegans*. *Dev Biol* **282**, 231–45.
- 1102 **Schaeffer, C., Devuyst, O. and Rampoldi, L.** (2021). Uromodulin: Roles in Health and  
1103 Disease. *Annu. Rev. Physiol.* **83**, 477–501.
- 1104 **Schindelin, J., Arganda-Carreras, I., Frise, E., Kaynig, V., Longair, M., Pietzsch, T.,**  
1105 **Preibisch, S., Rueden, C., Saalfeld, S., Schmid, B., et al.** (2012). Fiji: an open-source  
1106 platform for biological-image analysis. *Nat. Methods* **9**, 676–82.
- 1107 **Schultz, R. D. and Gumienny, T. L.** (2012). Visualization of *Caenorhabditis elegans* cuticular  
1108 structures using the lipophilic vital dye DiI. *J Vis Exp* **59**, e3362.

- 1109 **Sebastiano, M., Lassandro, F. and Bazzicalupo, P.** (1991). cut-1 a *Caenorhabditis elegans*  
1110 gene coding for a dauer-specific noncollagenous component of the cuticle. *Dev Biol* **146**,  
1111 519–30.
- 1112 **Sellon, J. B., Ghaffari, R. and Freeman, D. M.** (2019). The Tectorial Membrane: Mechanical  
1113 Properties and Functions. *Cold Spring Harb. Perspect. Med.* **9**, a033514.
- 1114 **Singh, R. N. and Sulston, J. E.** (1978). Some observations on molting in *C. elegans*.  
1115 *Nematologica* **24**, 63–71.
- 1116 **Sulston, J. E. and Horvitz, H. R.** (1977). Post-embryonic cell lineages of the nematode  
1117 *Caenorhabditis elegans*. *Dev Biol* **56**, 110–156.
- 1118 **van Loon, A. P., Erofeev, I. S., Maryshev, I. V., Goryachev, A. B. and Sagasti, A.** (2020).  
1119 Cortical contraction drives the 3D patterning of epithelial cell surfaces. *J. Cell Biol.* **219**,  
1120 e201904144.
- 1121 **van Loon, A. P., Erofeev, I. S., Goryachev, A. B. and Sagasti, A.** (2021). Stochastic  
1122 contraction of myosin minifilaments drives evolution of microridge protrusion patterns in  
1123 epithelial cells. *Mol. Biol. Cell* **32**, 1501–1513.
- 1124 **Vuong-Brender, T. T. K., Suman, S. K. and Labouesse, M.** (2017). The apical ECM preserves  
1125 embryonic integrity and distributes mechanical stress during morphogenesis.  
1126 *Development*.
- 1127 **Weimer, R. M.** (2006). Preservation of *C. elegans* tissue via high-pressure freezing and freeze-  
1128 substitution for ultrastructural analysis and immunocytochemistry. *Methods Mol. Biol.*  
1129 **351**, 203–21.
- 1130 **Whitsett, J. A., Wert, S. E. and Weaver, T. E.** (2015). Diseases of pulmonary surfactant  
1131 homeostasis. *Annu Rev Pathol* **10**, 371–93.
- 1132 **Willis, J. H., Munro, E., Lyczak, R. and Bowerman, B.** (2006). Conditional dominant  
1133 mutations in the *Caenorhabditis elegans* gene *act-2* identify cytoplasmic and muscle roles  
1134 for a redundant actin isoform. *Mol Biol Cell* **17**, 1051–64.
- 1135 **Zhang, H., Landmann, F., Zahreddine, H., Rodriguez, D., Koch, M. and Labouesse, M.**  
1136 (2011). A tension-induced mechanotransduction pathway promotes epithelial  
1137 morphogenesis. *Nature* **471**, 99–103.
- 1138



# Figure 1

**A**

**Larva developing from L4 to adult stage:**

**Lateral (seam) epidermis**

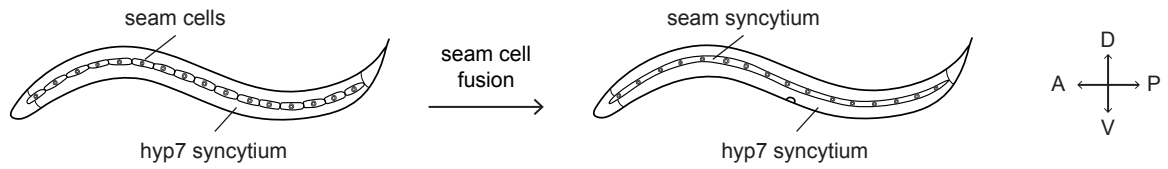

**Apical matrix**

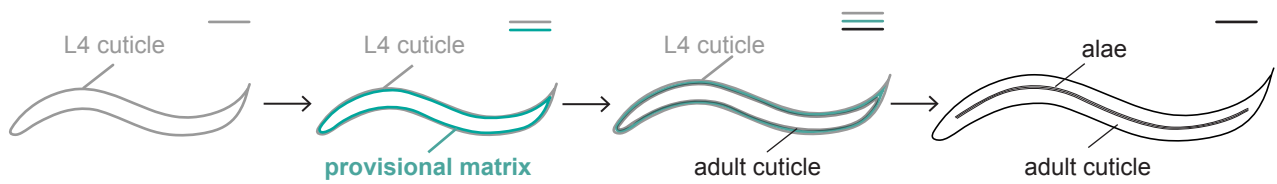

**B**

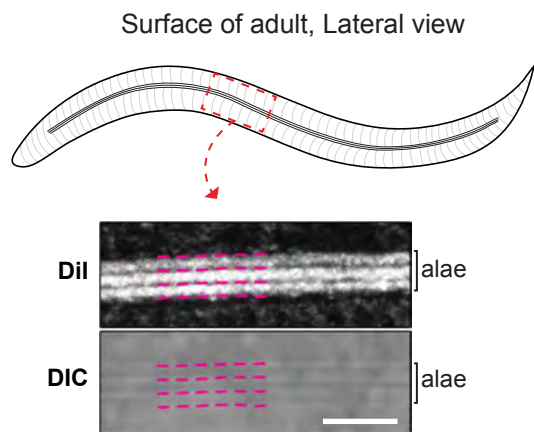

**C**

**Adult cuticle, Transverse view**

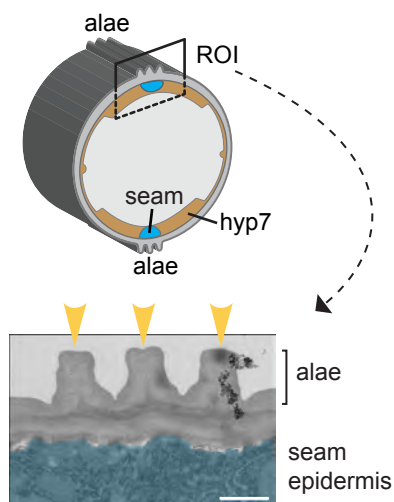

**D**

**DIC images from mid-L4 to adult stage**

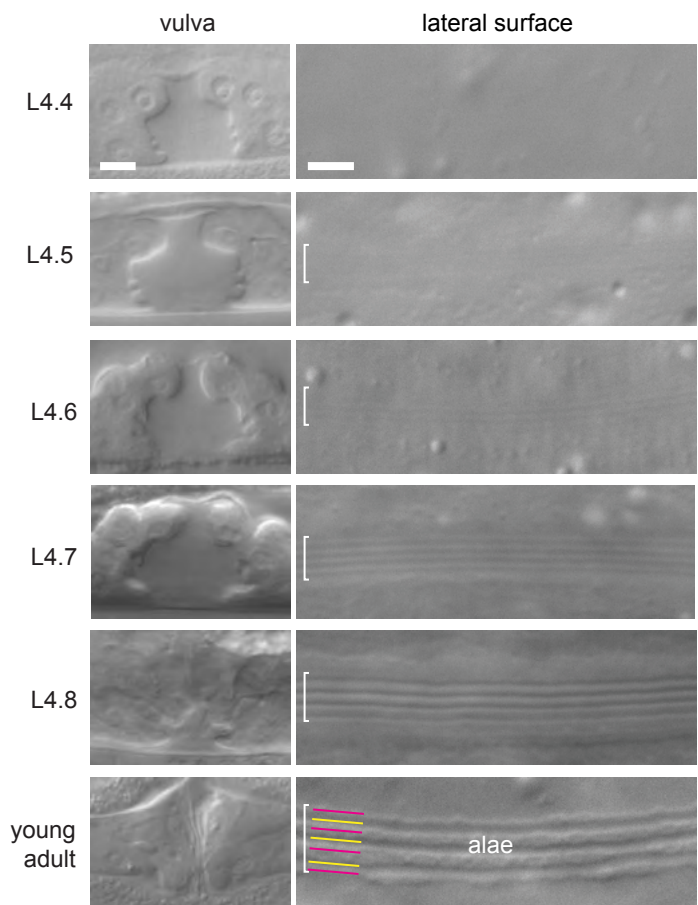

Figure 2

Katz et al. (2021)

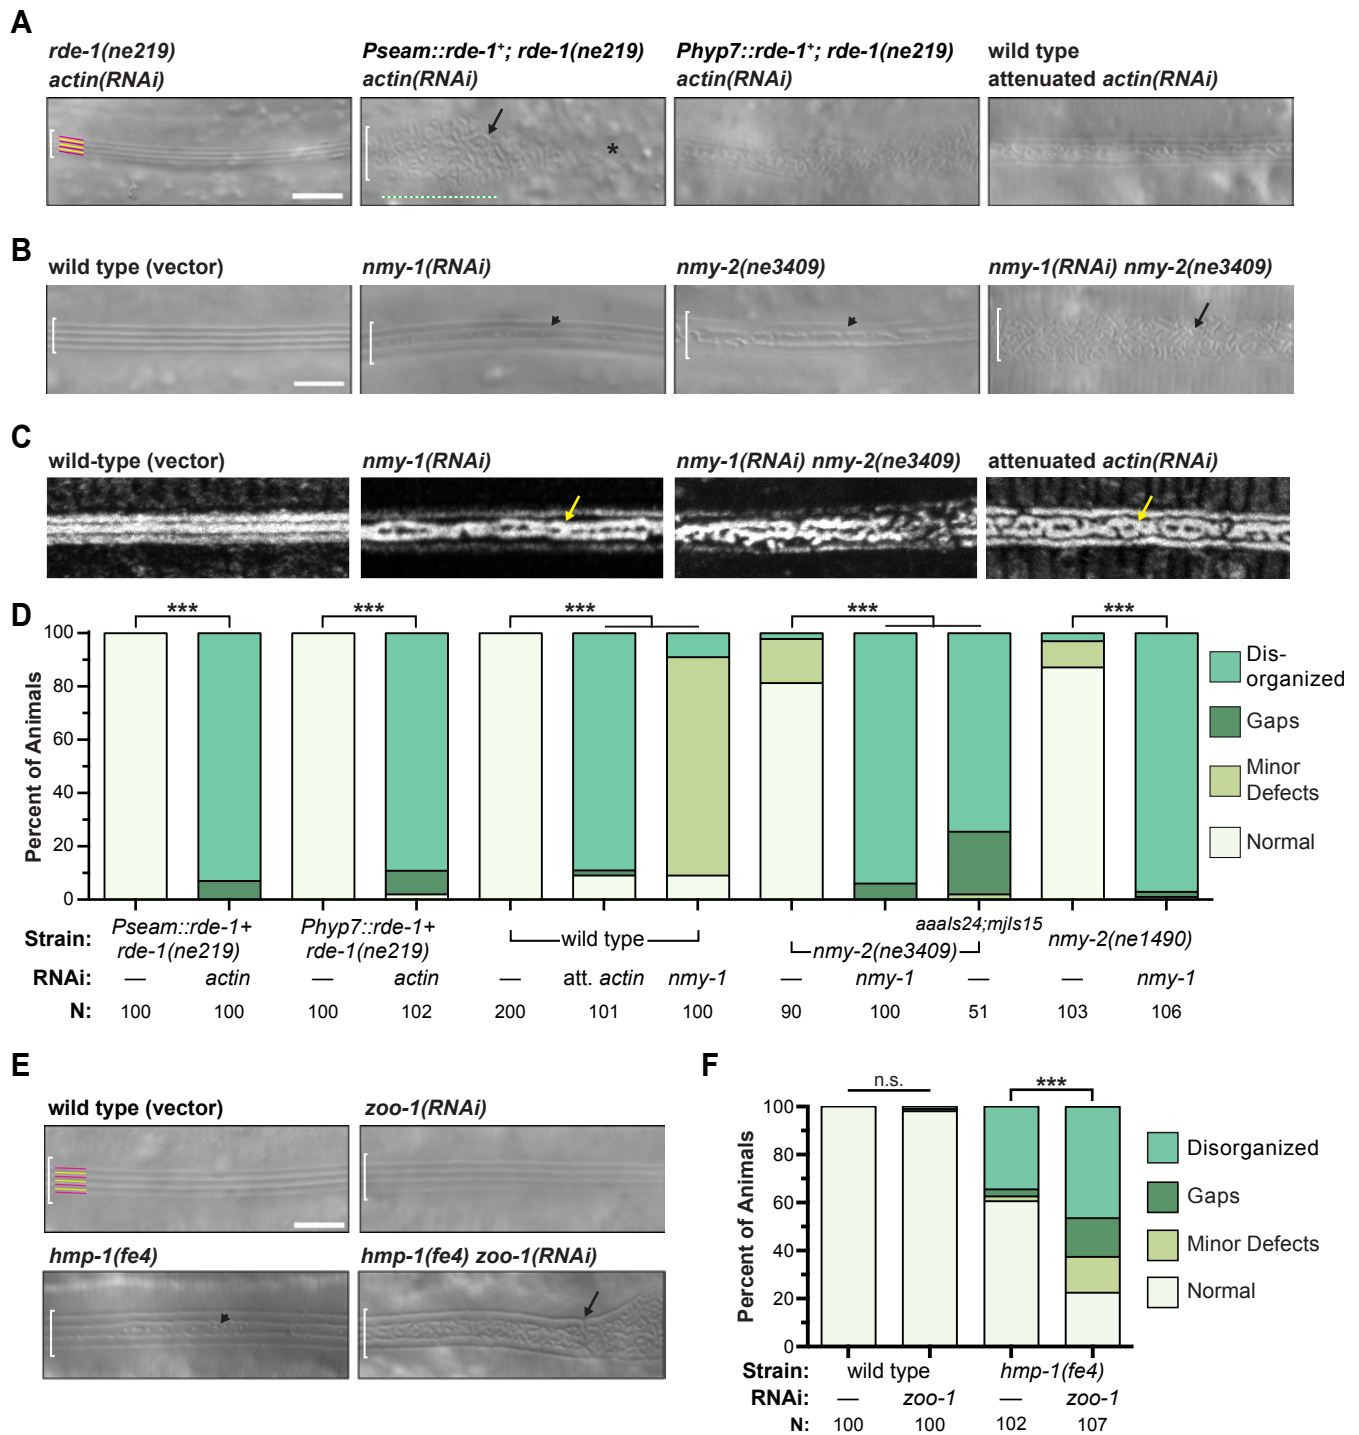

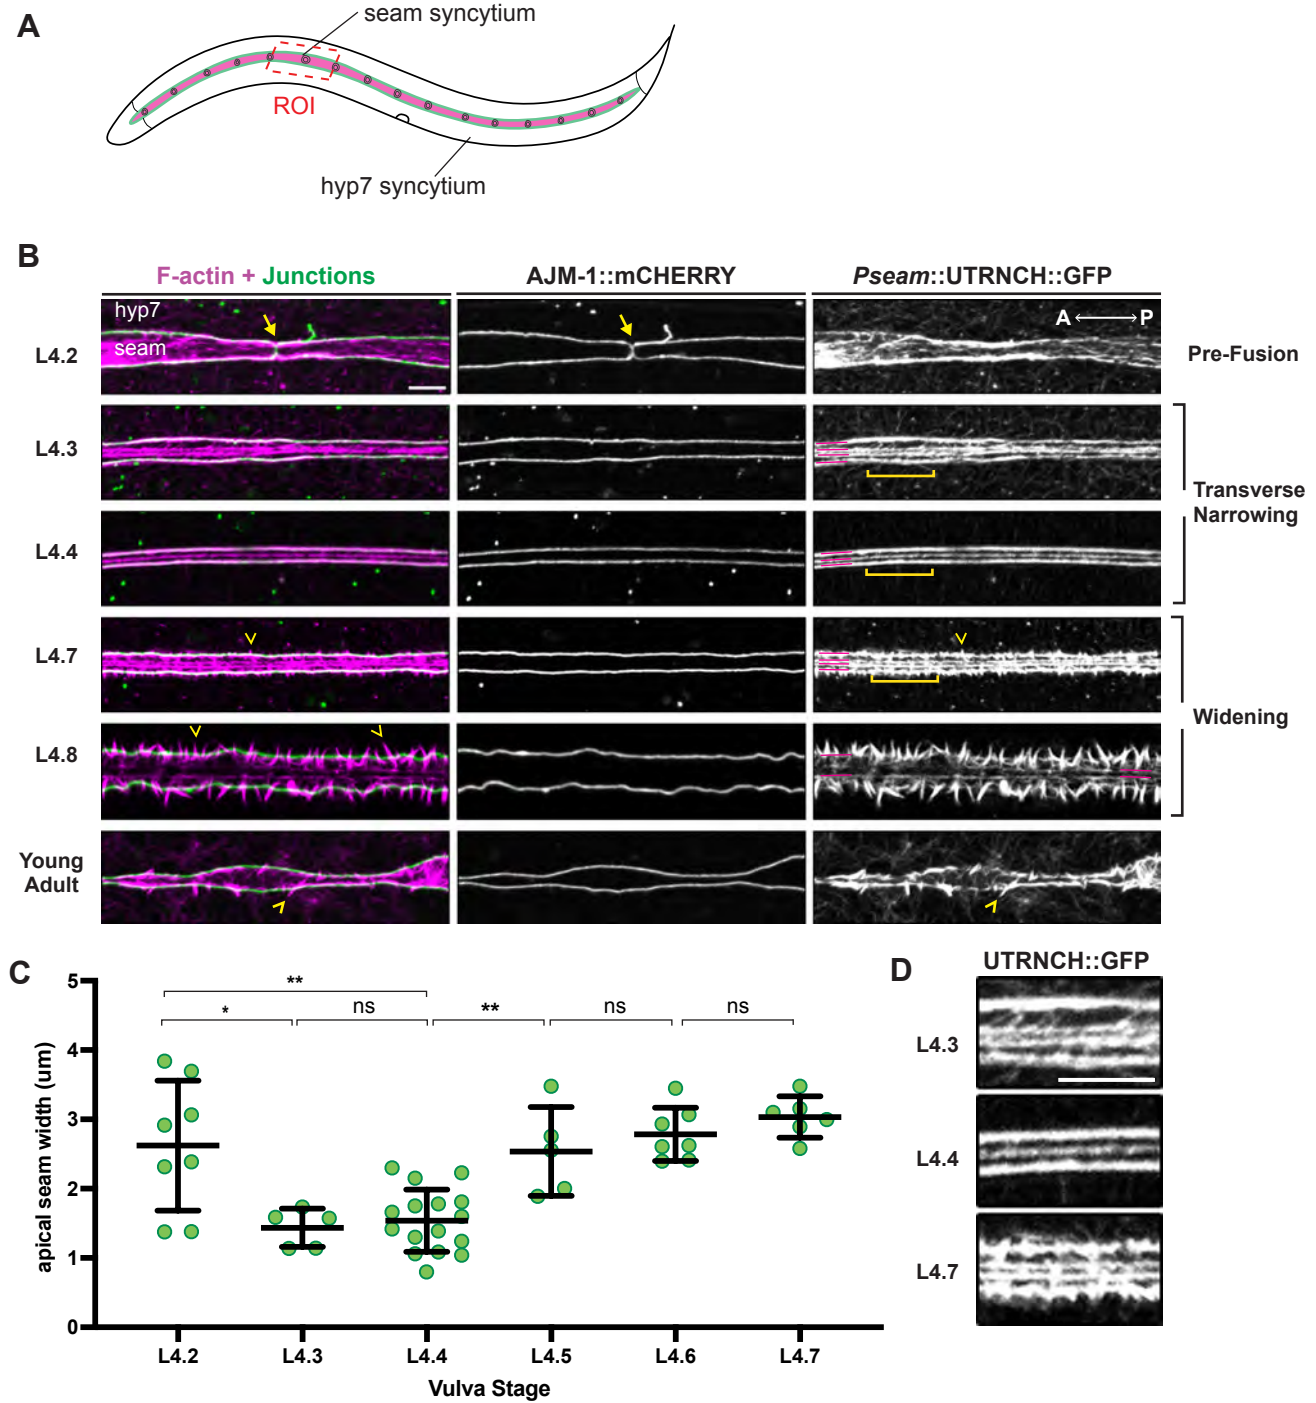



bioRxiv preprint doi: <https://doi.org/10.1101/2021.12.28.474392>; this version posted December 29, 2021. The copyright holder for this preprint (which was not certified by peer review) is the author/funder. All rights reserved. No reuse allowed without permission.

**A**

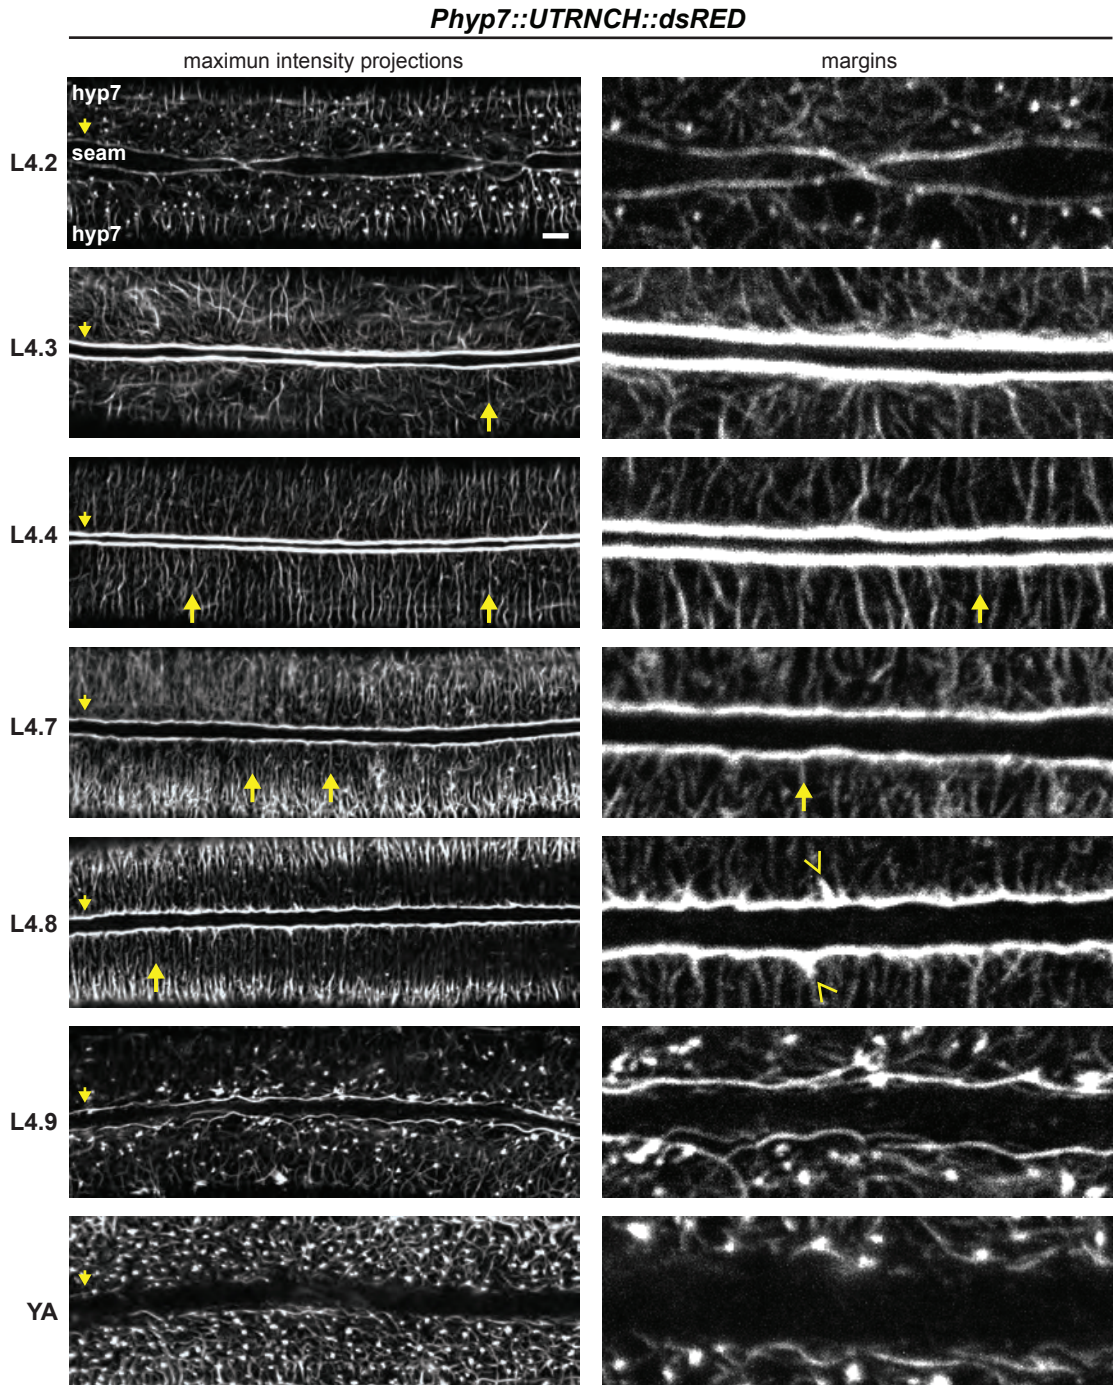

**B**

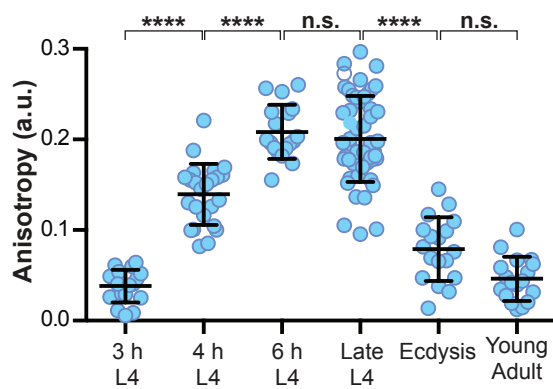

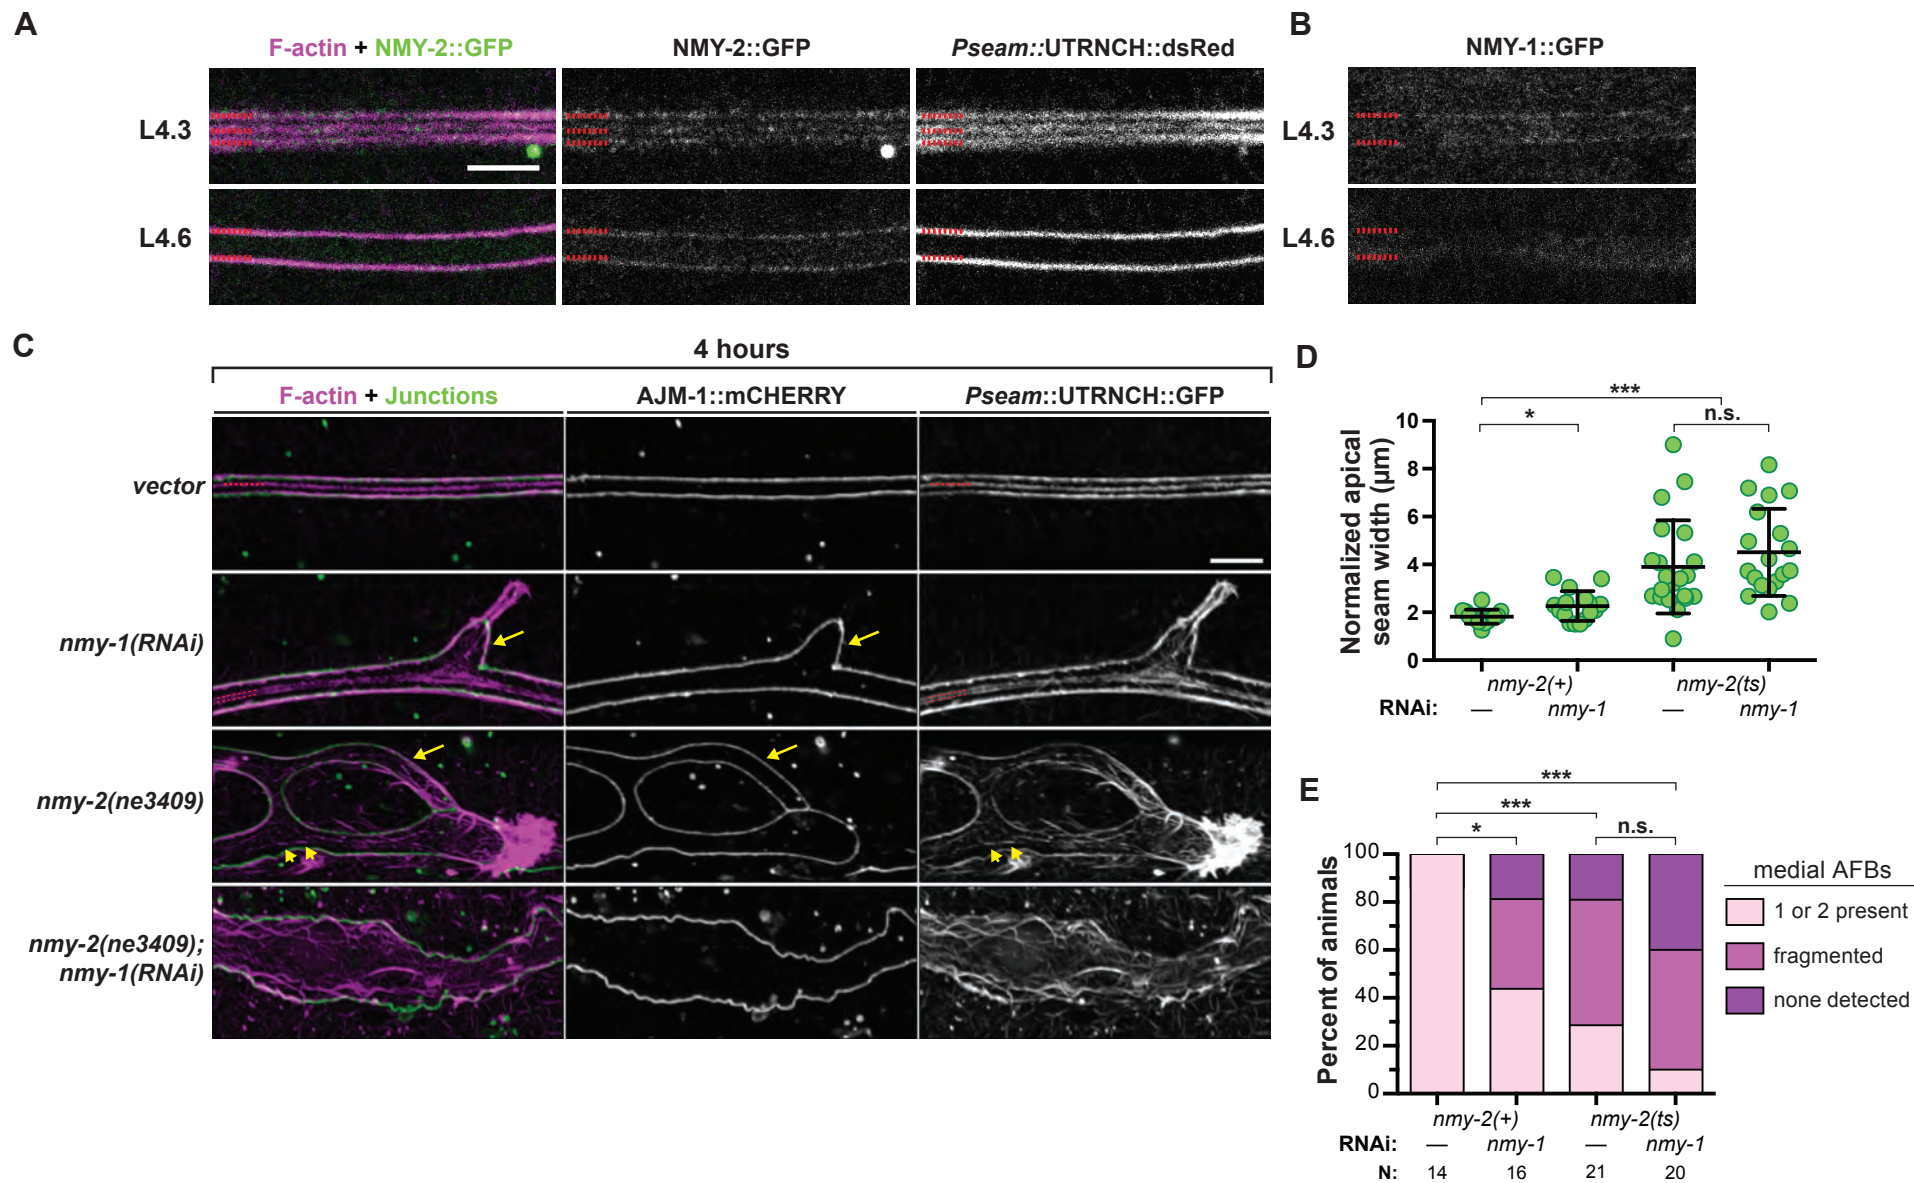



Figure 6

Katz et al (2021)

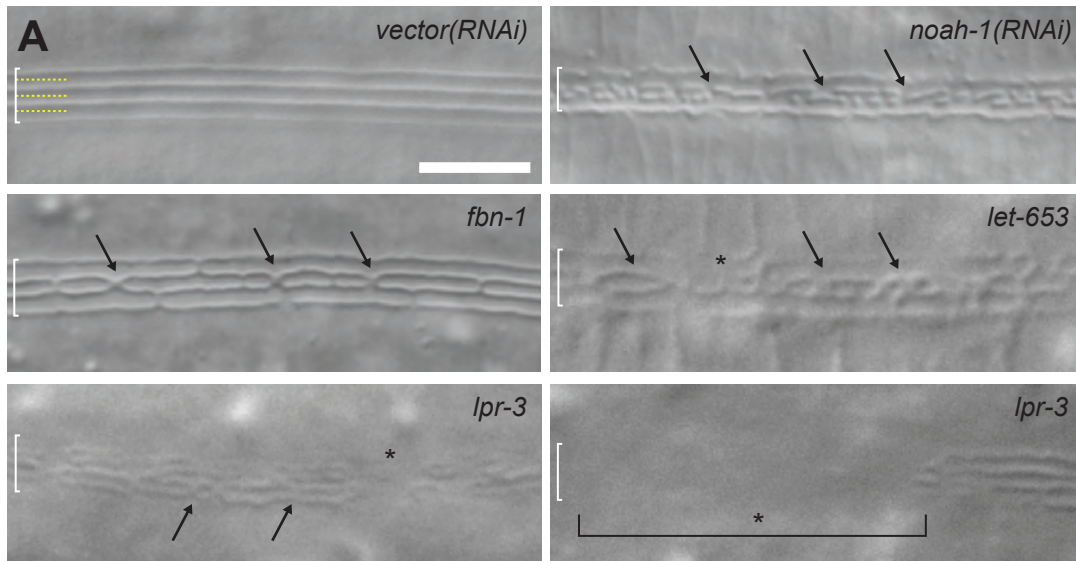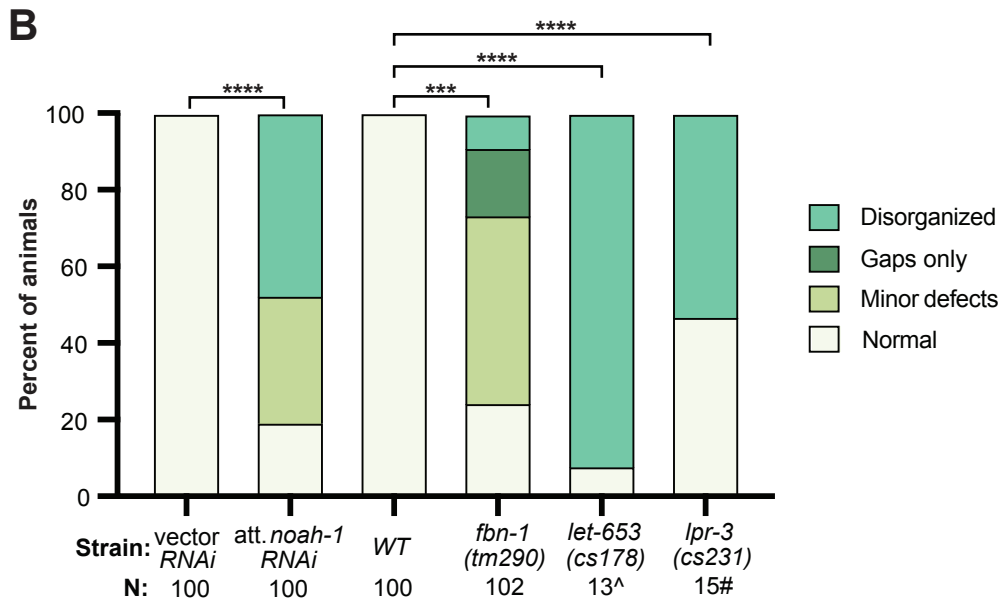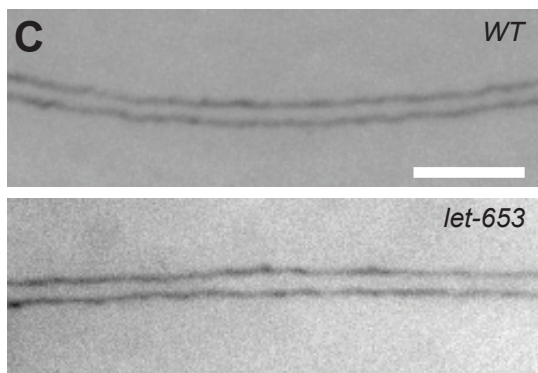

**D** Seam width at L4.4

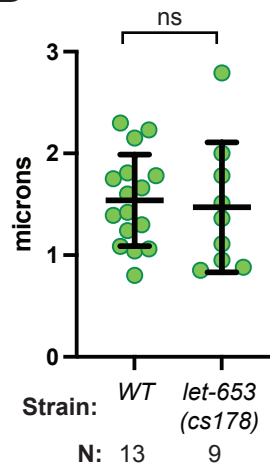

bioRxiv preprint doi: <https://doi.org/10.1101/2021.12.28.474392>; this version posted December 29, 2021. The copyright holder for this preprint (which was not certified by peer review) is the author/funder. All rights reserved. No reuse allowed without permission.

**A**

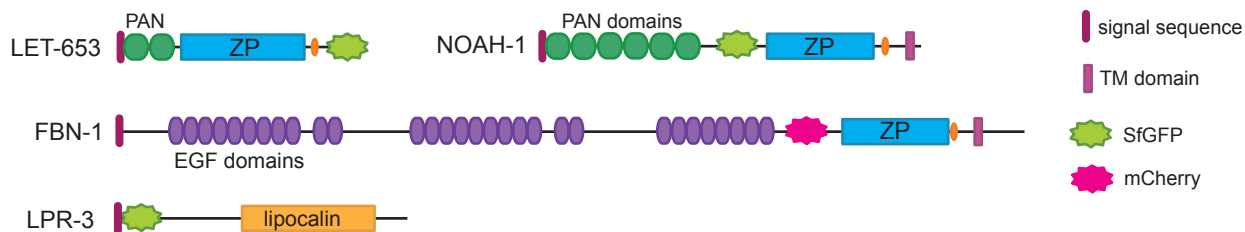

**B**

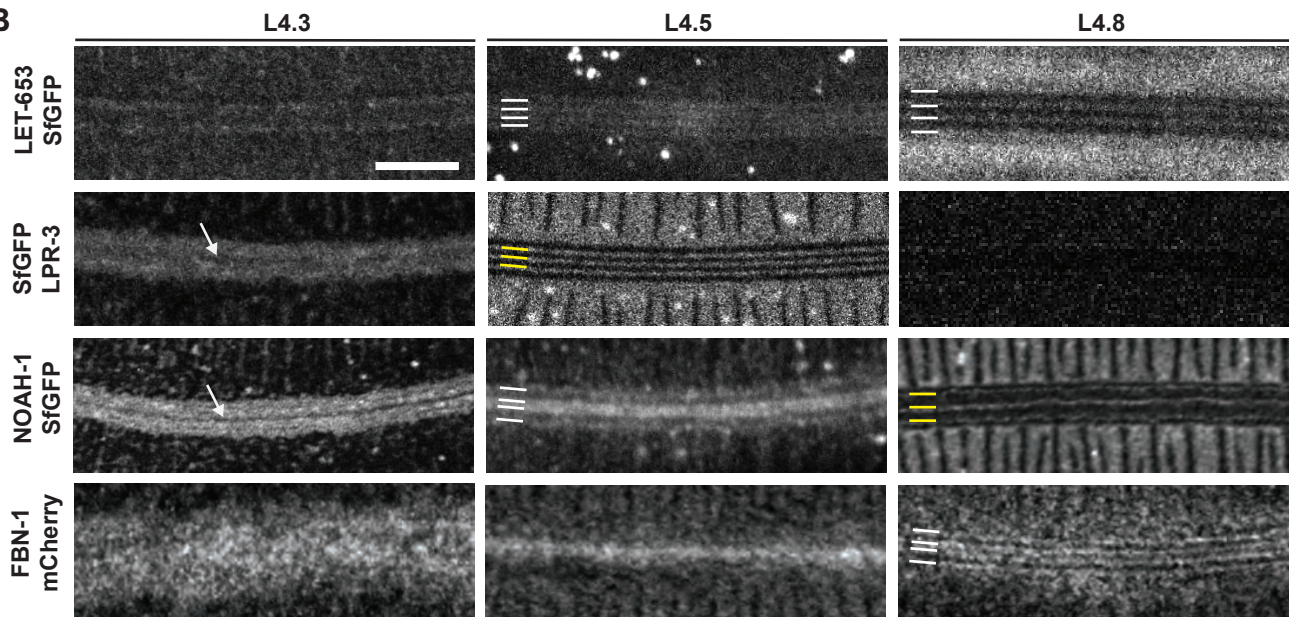

**C**

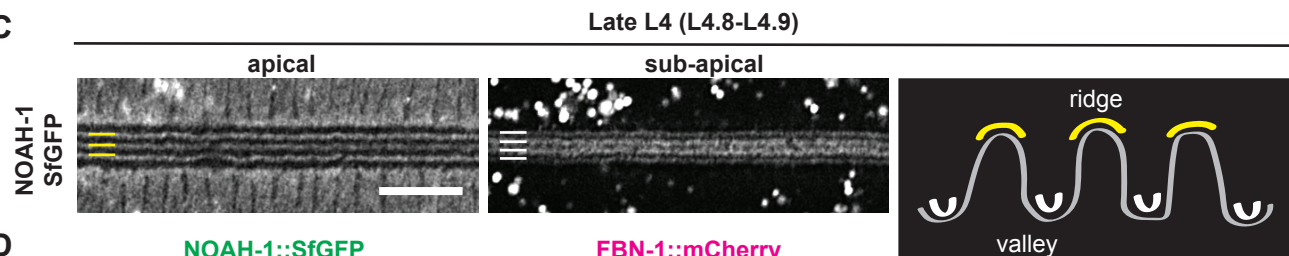

**D**

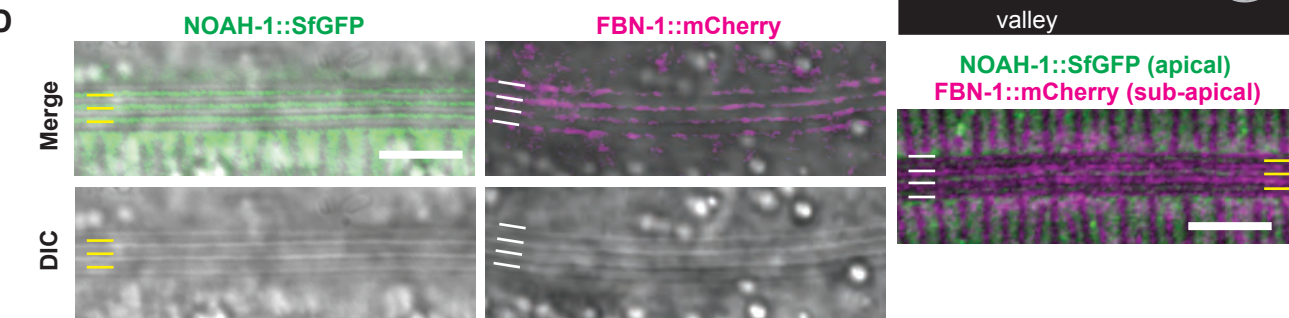

Figure 8

Katz et al. 2021

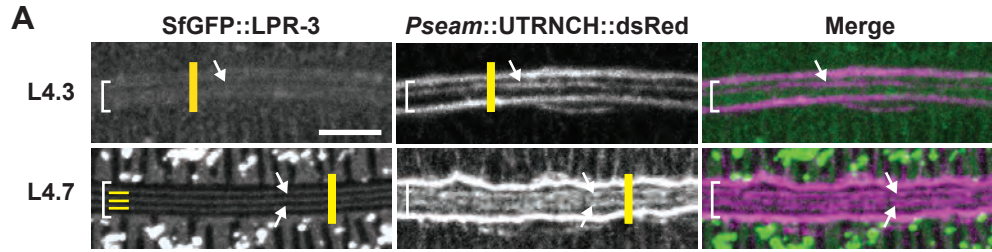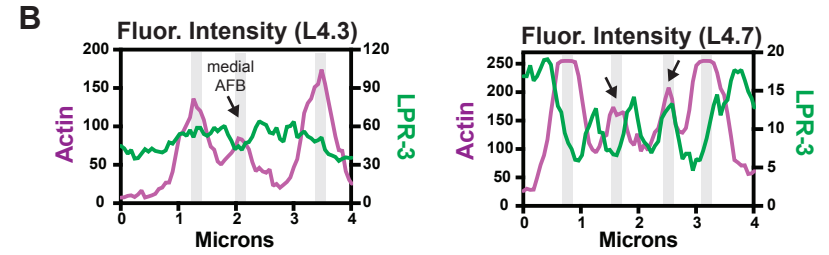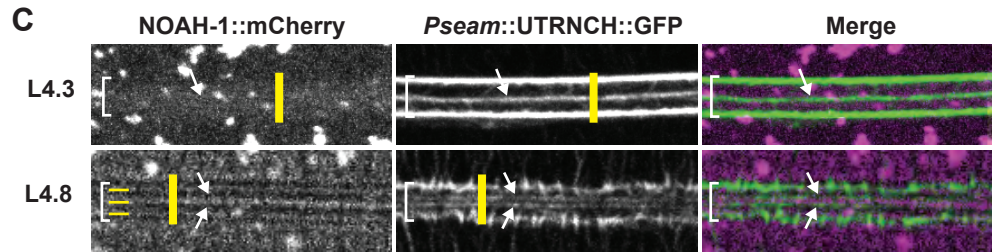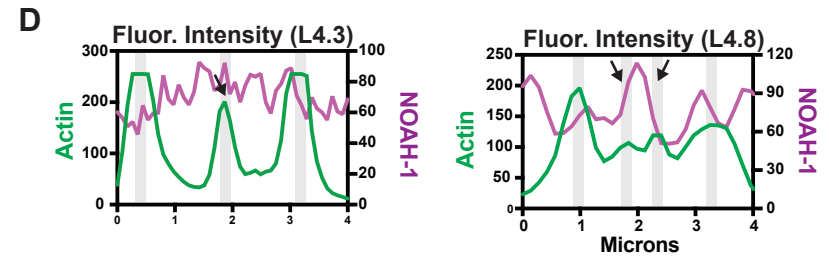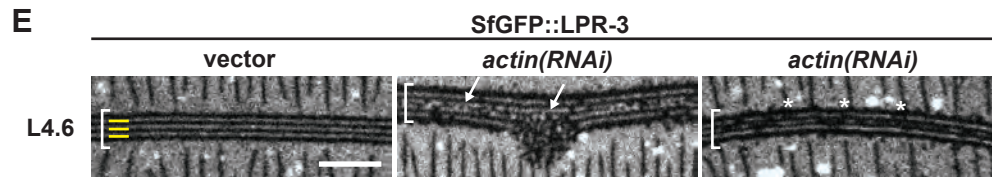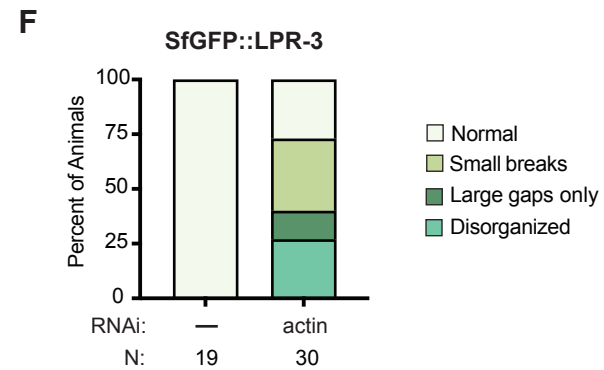



Figure 9

bioRxiv preprint doi: <https://doi.org/10.1101/2021.12.28.474392>; this version posted December 29, 2021. The copyright holder for this preprint (which was not certified by peer review) is the author/funder. All rights reserved. No reuse allowed without permission.

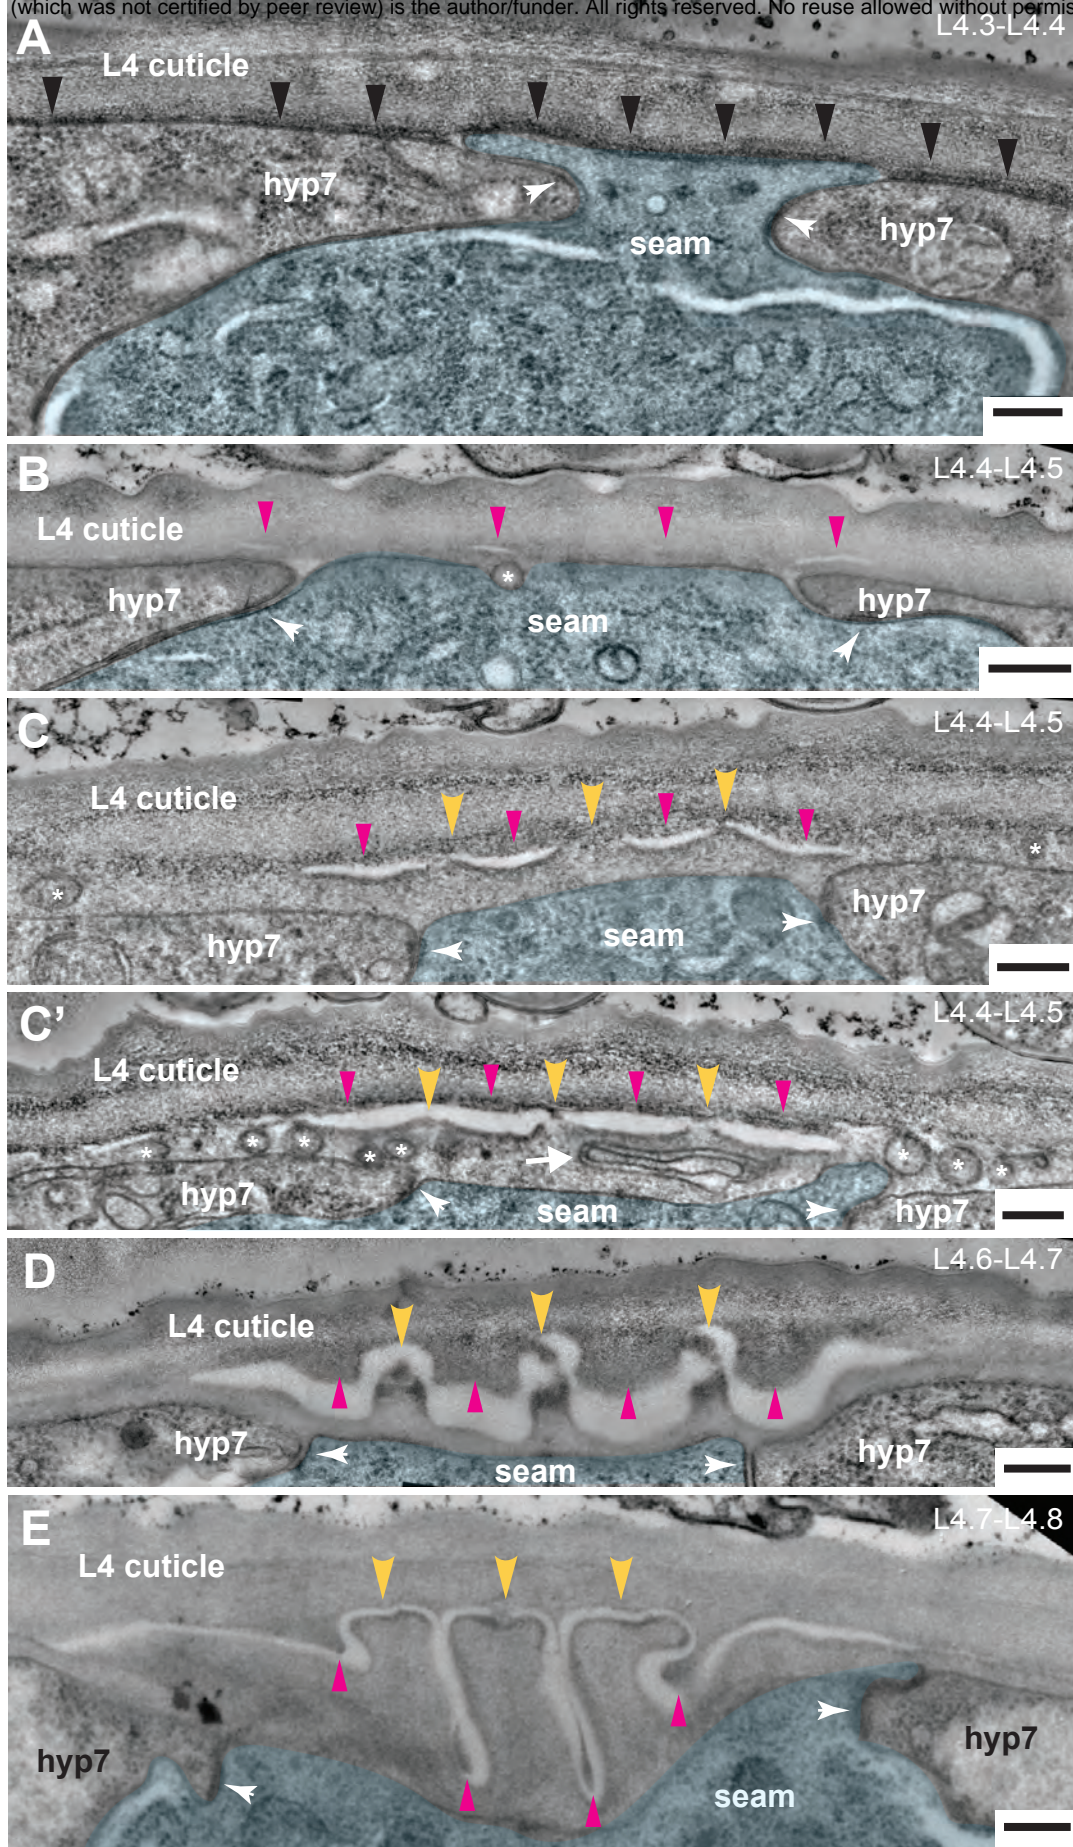



Figure 10

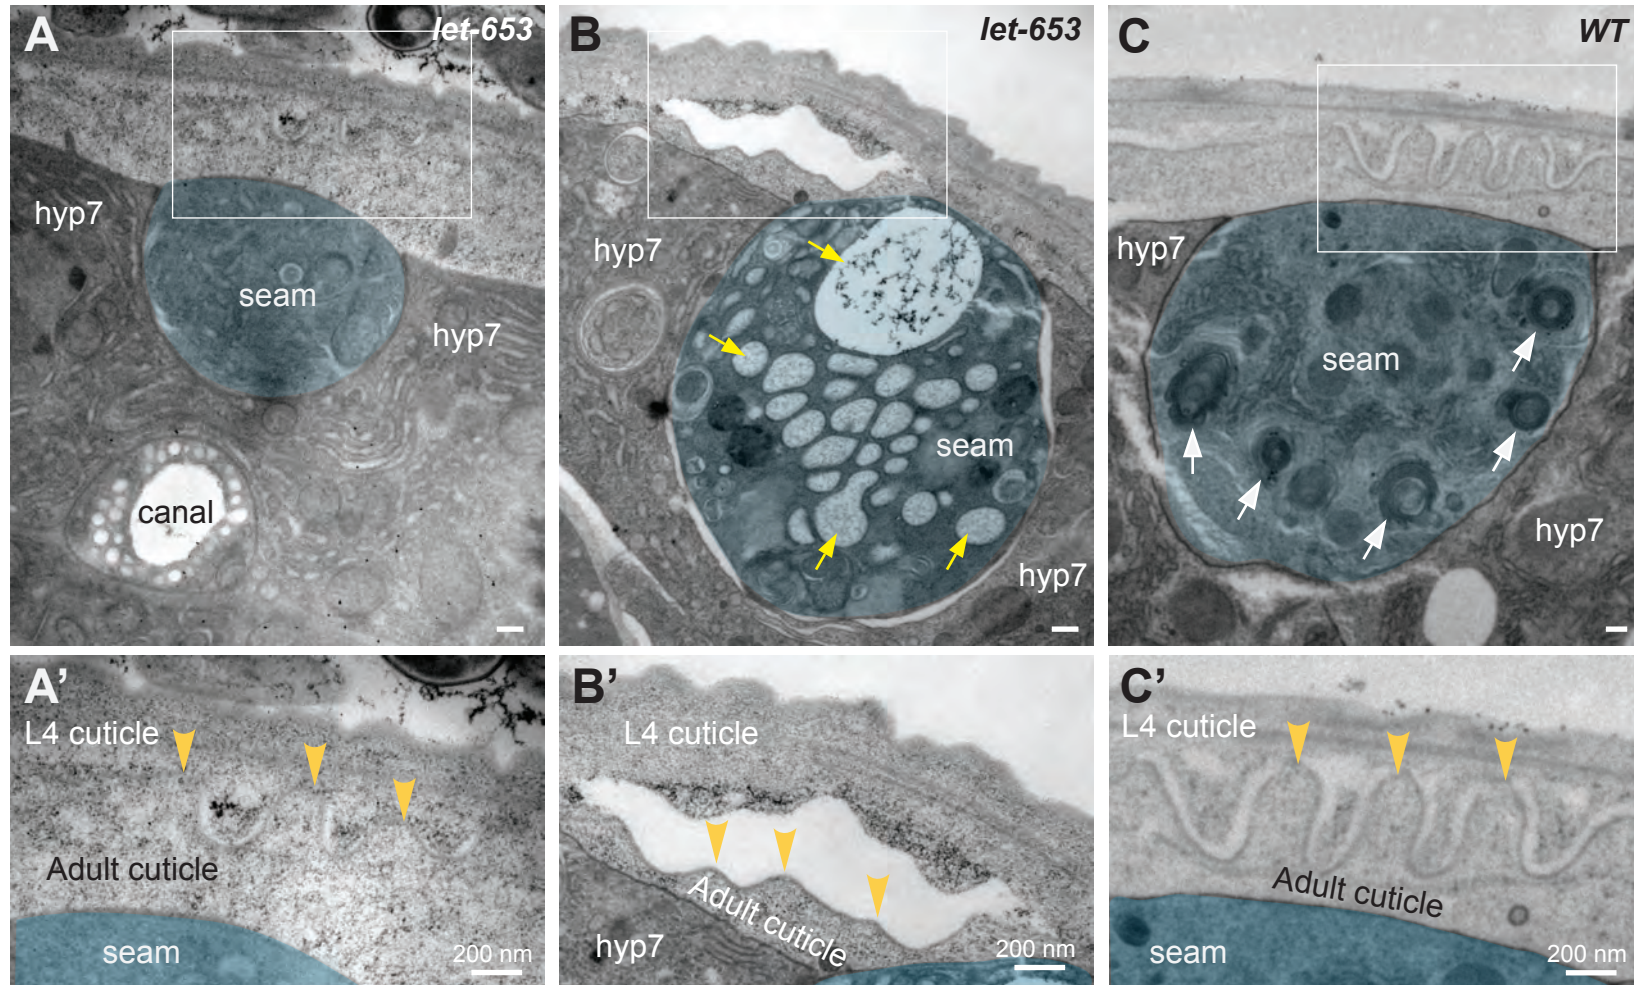



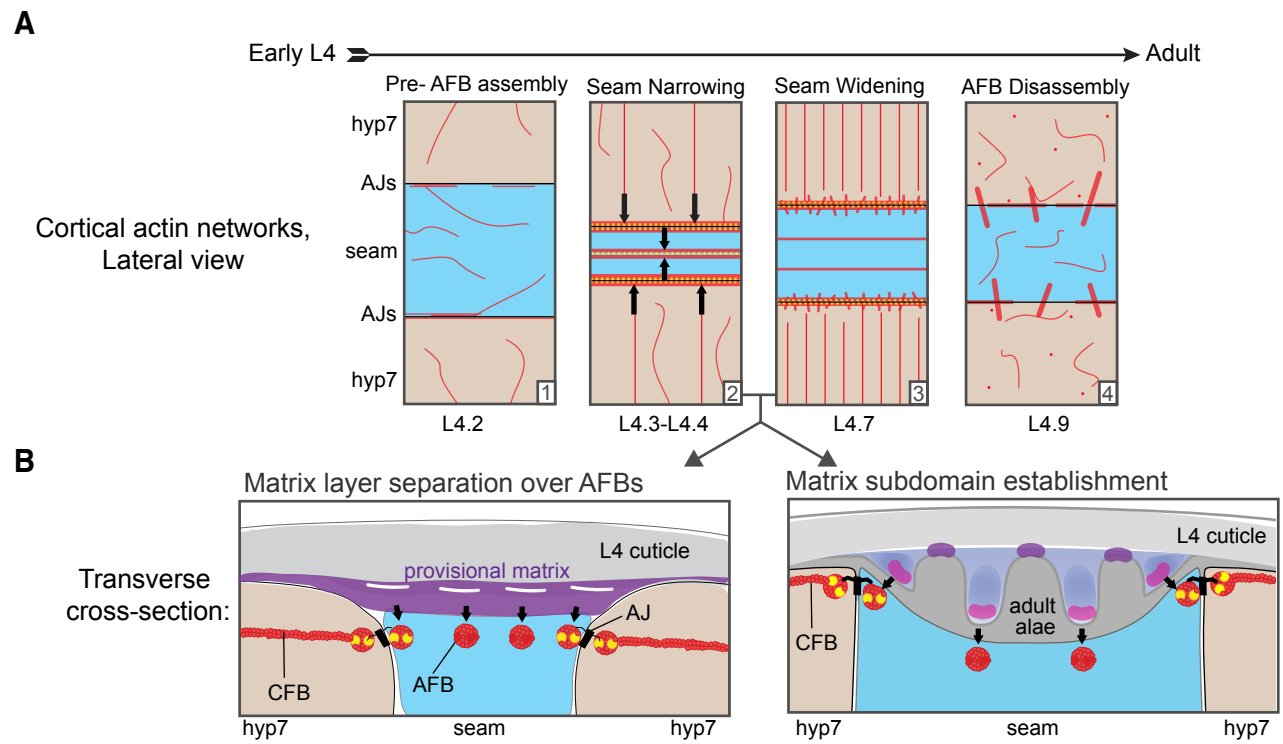

Source: https://www.biorxiv.org/content/10.1101/2021.12.28.474392v1.full.pdf
